# Supplementary material for: Analysis of the laccase gene family and miR397-/miR408-mediated posttranscriptional regulation in Salvia miltiorrhiza
Source: PeerJ. 2019 Aug 29;7:e7605. doi: 10.7717/peerj.7605 (PMC6717658; doi:10.7717/peerj.7605)
Supplement: Supplemental Information 16 [file peerj-07-7605-s016.xls]

## Sheet: raw data
	Ct	Ct (REF)	dCt	ddCt	fold	log (fold)	exp. average	mean centered		exp. stDev	autoscaled	autoscaled multiplied by mean exp. stDev	Avg	SEM	lower95%CI	upper95%CI		linAvg	LinLCI	LinUCI	Power	recalLCI	RecalUCI
SmLAC1-Rt	30.9892	21.0621	9.92704	0	1	0	0.341579	-0.341579		1.30325	-0.262097	-0.348038	-0.267235	0.0672714	-0.55668	0.0222108		0.540462	0.277536	1.05247	1.05571	0.542125	2.05585
SmLAC1-St	34.0806	20.8444	13.2363	3.30925	0.100883	-0.996183		-1.33776			-1.02648	-1.36306	-1.29364	0.0468903	-1.49539	-1.09189		0.0508581	0.0319601	0.0809307	0.0993437	0.0624291	0.158086
SmLAC1-Le	30.1419	21.0058	9.13606	-0.790979	1.73025	0.238109		-0.103471			-0.0793941	-0.105427	-0.29078	0.092888	-0.690444	0.108885		0.511941	0.203965	1.28495	1	0.398415	2.50995
SmLAC1-Fl	23.5401	20.6701	2.86996	-7.05708	133.165	2.12439		1.78281			1.36797	1.81652	1.85165	0.0237553	1.74944	1.95386		71.0647	56.1621	89.9217	138.814	109.704	175.648
SmLAC1-Rt	30.9183	20.9621	9.95616	0.0291236	0.980015	-0.00876708	0.320665	-0.329432		1.36705	-0.24098	-0.319997
SmLAC1-St	34.0108	21.0303	12.9805	3.05342	0.120456	-0.91917		-1.23984			-0.906941	-1.20432
SmLAC1-Le	31.1419	21.0058	10.1361	0.209021	0.865124	-0.0629214		-0.383587			-0.280594	-0.3726
SmLAC1-Fl	23.5635	21.189	2.37457	-7.55247	187.724	2.27352		1.95285			1.42851	1.89692
SmLAC1-Rt	30.0518	20.9921	9.05969	-0.867352	1.82431	0.261099	0.393308	-0.132209		1.31338	-0.100663	-0.13367
SmLAC1-St	33.9806	21.0444	12.9363	3.00925	0.124201	-0.905874		-1.29918			-0.989187	-1.31354
SmLAC1-Le	30.9419	21.0258	9.91606	-0.0109795	1.00764	0.00330516		-0.390003			-0.296945	-0.394312
SmLAC1-Fl	23.5401	20.9701	2.56996	-7.35708	163.946	2.2147		1.82139			1.38679	1.84152
SmLAC2-Rt	25.5633	21.0621	4.50114	0	1	0	0.217852	-0.217852		0.560468	-0.388696	-0.230333	-0.269989	0.0203642	-0.357609	-0.182369		0.537045	0.438926	0.657099	1.12498	0.919447	1.37647
SmLAC2-St	25.6647	20.8444	4.82031	0.319171	0.80153	-0.09608		-0.313932			-0.560124	-0.331918	-0.296559	0.0176798	-0.372629	-0.220489		0.505174	0.424005	0.601882	1.05822	0.888191	1.2608
SmLAC2-Le	25.801	21.0058	4.79518	0.294047	0.815611	-0.0885169		-0.306368			-0.54663	-0.323922	-0.321136	0.00465418	-0.341161	-0.301111		0.47738	0.455868	0.499907	1	0.954937	1.04719
SmLAC2-Fl	21.6633	20.6701	0.993169	-3.50797	11.3764	1.056		0.838152			1.49545	0.886173	0.887684	0.000763609	0.884399	0.89097		7.72119	7.663	7.77982	16.1741	16.0522	16.2969
SmLAC2-Rt	25.6606	20.9621	4.69847	0.197338	0.872159	-0.0594046	0.241711	-0.301116		0.63325	-0.475508	-0.281776
SmLAC2-St	25.7191	21.0303	4.68874	0.187604	0.878063	-0.0564745		-0.298186			-0.470881	-0.279035
SmLAC2-Le	25.8664	21.0058	4.86056	0.359421	0.779477	-0.108196		-0.349908			-0.552558	-0.327435
SmLAC2-Fl	21.734	21.189	0.544985	-3.95615	15.521	1.19092		0.949209			1.49895	0.888246
SmLAC2-Rt	25.5295	20.9921	4.53735	0.036216	0.975209	-0.0109021	0.282654	-0.293556		0.584021	-0.502646	-0.297858
SmLAC2-St	25.5191	21.0444	4.47471	-0.0264267	1.01849	0.00795522		-0.274699			-0.470358	-0.278724
SmLAC2-Le	25.6097	21.0258	4.58382	0.0826837	0.944299	-0.0248903		-0.307544			-0.526598	-0.312051
SmLAC2-Fl	21.6229	20.9701	0.652839	-3.8483	14.403	1.15845		0.875799			1.4996	0.888633
SmLAC3-Rt	26.0642	21.0621	5.00201	0	1	0	-0.43883	0.43883		0.878706	0.499405	0.450797	0.376926	0.0390292	0.208996	0.544855		2.38191	1.61807	3.50635	27.2987	18.5444	40.1857
SmLAC3-St	28.3975	20.8444	7.55314	2.55113	0.170622	-0.767966		-0.329136			-0.374568	-0.338111	-0.34411	0.0374739	-0.505348	-0.182873		0.452783	0.312358	0.656337	5.18927	3.57988	7.52218
SmLAC3-Le	30.9776	21.0058	9.97174	4.96973	0.0319125	-1.49604		-1.05721			-1.20314	-1.08604	-1.05922	0.0246096	-1.1651	-0.95333		0.0872536	0.0683749	0.111345	1	0.783634	1.27611
SmLAC3-Fl	23.9823	20.6701	3.3122	-1.68981	3.22614	0.508683		0.947514			1.07831	0.973352	1.0264	0.0268409	0.910914	1.14189		10.6268	8.14543	13.864	121.792	93.3535	158.893
SmLAC3-Rt	26.0853	20.9621	5.12319	0.121182	0.919434	-0.0364793	-0.40797	0.371491		0.926765	0.42277	0.361832
SmLAC3-St	28.7921	21.0303	7.76178	2.75976	0.147648	-0.830772		-0.422802			-0.481164	-0.411808
SmLAC3-Le	30.808	21.0058	9.8022	4.80019	0.0358922	-1.445		-1.03703			-1.18018	-1.01007
SmLAC3-Fl	23.9308	21.189	2.74187	-2.26014	4.79038	0.68037		1.08834			1.23857	1.06004
SmLAC3-Rt	25.954	20.6921	5.26189	0.259875	0.83516	-0.0782301	-0.39633	0.3181		0.902534	0.36201	0.318148
SmLAC3-St	28.1921	20.9355	7.2566	2.25459	0.209556	-0.6787		-0.282369			-0.321347	-0.282411
SmLAC3-Le	30.7835	20.8726	9.91087	4.90886	0.0332878	-1.47771		-1.08138			-1.23065	-1.08155
SmLAC3-Fl	23.856	21.011	2.84501	-2.157	4.45987	0.649323		1.04565			1.18999	1.04581
SmLAC4-Rt	28.3388	20.6672	7.67154	0	1	0	-0.276707	0.276707		0.746522	0.370662	0.295015	0.351701	0.0283456	0.22974	0.473662		2.24751	1.69723	2.9762	14.4495	10.9117	19.1343
SmLAC4-St	31.0912	20.7829	10.3083	2.63672	0.160794	-0.793731		-0.517024			-0.692577	-0.551233	-0.482807	0.0353974	-0.63511	-0.330505		0.328997	0.231681	0.467192	2.11516	1.4895	3.00363
SmLAC4-Le	31.7513	20.8824	10.8689	3.19737	0.109017	-0.962504		-0.685797			-0.918656	-0.731173	-0.808151	0.0391049	-0.976405	-0.639896		0.155543	0.105583	0.229142	1	0.678805	1.47318
SmLAC4-Fl	26.3877	20.8735	5.51425	-2.15728	4.46074	0.649407		0.926114			1.24057	0.98739	0.939257	0.0241326	0.835423	1.04309		8.69475	6.84578	11.0431	55.8994	44.0122	70.9973
SmLAC4-Rt	28.1394	20.9247	7.21467	-0.456862	1.37255	0.137529	-0.251487	0.389016		0.816135	0.476656	0.379378
SmLAC4-St	30.9838	21.0024	9.98143	2.3099	0.201675	-0.695348		-0.443862			-0.543858	-0.432865
SmLAC4-Le	32.4052	20.9735	11.4317	3.76013	0.0738054	-1.13191		-0.880425			-1.07877	-0.858613
SmLAC4-Fl	26.3935	20.9935	5.40005	-2.27148	4.8282	0.683785		0.935271			1.14598	0.9121
SmLAC4-Rt	28.0394	20.6921	7.34721	-0.324327	1.25208	0.0976323	-0.297033	0.394665		0.825089	0.47833	0.38071
SmLAC4-St	31.1927	20.9355	10.2572	2.58571	0.16658	-0.778377		-0.481344			-0.583384	-0.464325
SmLAC4-Le	32.4052	20.8726	11.5326	3.86105	0.0688187	-1.16229		-0.86526			-1.04869	-0.834666
SmLAC4-Fl	26.507	21.011	5.49598	-2.17555	4.51759	0.654906		0.951939			1.15374	0.91828
SmLAC5-Rt	23.0988	20.6724	2.4264	0	1	0	-1.17875	1.17875		1.21592	0.969431	1.23445	1.21039	0.0128995	1.15488	1.26589		16.2325	14.2851	18.4454	159.923	140.737	181.724
SmLAC5-St	24.1195	20.7829	3.33652	0.910128	0.532138	-0.273976		0.904775			0.744108	0.947527	0.982218	0.0186653	0.901908	1.06253		9.59883	7.97826	11.5486	94.5676	78.6018	113.777
SmLAC5-Le	30.1255	20.8824	9.24311	6.81671	0.00887085	-2.05203		-0.873284			-0.718208	-0.914548	-0.993524	0.0494655	-1.20636	-0.780692		0.101502	0.0621789	0.165695	1	0.612586	1.63242
SmLAC5-Fl	31.2359	20.8735	10.3625	7.93607	0.00408325	-2.38899		-1.21024			-0.995331	-1.26743	-1.19908	0.0438956	-1.38795	-1.01021		0.0632296	0.0409311	0.097676	0.622938	0.403253	0.962304
SmLAC5-Rt	23.1648	20.9247	2.24014	-0.186253	1.1378	0.0560678	-1.21254	1.2686		1.33902	0.947412	1.20641
SmLAC5-St	24.0068	21.0024	3.00441	0.578011	0.669887	-0.173999		1.03854			0.775595	0.987623
SmLAC5-Le	30.8561	20.9735	9.88261	7.45621	0.00569451	-2.24454		-1.03201			-0.770718	-0.981413
SmLAC5-Fl	31.6837	20.9935	10.6903	8.26386	0.00325334	-2.48767		-1.27513			-0.952289	-1.21262
SmLAC5-Rt	23.1672	20.6921	2.47506	0.0486666	0.96683	-0.0146501	-1.19729	1.18264		1.26518	0.934759	1.1903
SmLAC5-St	24.0007	20.9355	3.06518	0.638783	0.642255	-0.192293		1.005			0.79435	1.0115
SmLAC5-Le	30.8561	20.8726	9.98353	7.55714	0.00530976	-2.27492		-1.07763			-0.851762	-1.08461
SmLAC5-Fl	31.1021	21.011	10.0911	7.66466	0.00492842	-2.30729		-1.11			-0.877346	-1.11719
SmLAC6-Rt	29.891	20.7657	9.1253	0	1	0	0.630633	-0.630633		1.01584	-0.620802	-0.637215	-0.604309	0.0342109	-0.751506	-0.457111		0.248709	0.177212	0.349051	0.359077	0.255853	0.503948
SmLAC6-St	22.8933	20.6911	2.20217	-6.92313	121.358	2.08407		1.45344			1.43078	1.46861	1.49111	0.0169785	1.41805	1.56416		30.9818	26.1851	36.6571	44.7304	37.8051	52.9243
SmLAC6-Le	28.1234	20.894	7.2294	-1.8959	3.72154	0.570723		-0.0599099			-0.0589759	-0.0605353	-0.159497	0.0806229	-0.506389	0.187395		0.692633	0.31161	1.53956	1	0.449892	2.22276
SmLAC6-Fl	30.1795	20.6148	9.56466	0.43936	0.737462	-0.132261		-0.762893			-0.751	-0.770857	-0.727301	0.0302131	-0.857297	-0.597304		0.18737	0.1389	0.252753	0.270518	0.200539	0.364916
SmLAC6-Rt	29.9294	20.6621	9.26726	0.141961	0.906286	-0.0427347	0.605584	-0.648318		1.04009	-0.623327	-0.639807
SmLAC6-St	22.761	20.6303	2.13063	-6.99467	127.528	2.1056		1.50002			1.4422	1.48033
SmLAC6-Le	28.0304	20.5844	7.44592	-1.67938	3.2029	0.505543		-0.100041			-0.0961843	-0.0987274
SmLAC6-Fl	30.1995	20.589	9.61056	0.485262	0.714367	-0.146078		-0.751662			-0.722687	-0.741795
SmLAC6-Rt	29.7257	20.7621	8.96357	-0.161735	1.11863	0.0486871	0.582998	-0.534311		1.02339	-0.522099	-0.535903
SmLAC6-St	22.8701	20.7303	2.13978	-6.98552	126.721	2.10285		1.51985			1.48512	1.52438
SmLAC6-Le	29.0304	20.7844	8.24592	-0.879377	1.83958	0.264719		-0.318279			-0.311005	-0.319228
SmLAC6-Fl	30.0753	20.6701	9.40522	0.279919	0.823637	-0.084264		-0.667262			-0.652012	-0.669251
SmLAC7-Rt	25.9902	20.7657	5.22451	0	1	0	-0.38167	0.38167		0.908464	0.420126	0.391504	0.411828	0.0158884	0.343466	0.48019		2.58124	2.20529	3.02127	13.4068	11.4541	15.6923
SmLAC7-St	23.5204	20.6911	2.82936	-2.39515	5.26032	0.721012		1.10268			1.21379	1.13109	1.12021	0.00917467	1.08073	1.15968		13.1889	12.043	14.4439	68.5024	62.5504	75.0207
SmLAC7-Le	29.5872	20.894	8.6932	3.46869	0.0903275	-1.04418		-0.66251			-0.729264	-0.679581	-0.715497	0.0212952	-0.807123	-0.623871		0.192532	0.155911	0.237755	1	0.809793	1.23488
SmLAC7-Fl	29.8373	20.6148	9.22248	3.99798	0.0625877	-1.20351		-0.821841			-0.904649	-0.843018	-0.81654	0.0148008	-0.880222	-0.752857		0.152567	0.131758	0.176662	0.792423	0.684344	0.917571
SmLAC7-Rt	26.009	20.6621	5.34686	0.12235	0.91869	-0.0368309	-0.44034	0.403509		0.938092	0.430139	0.400835
SmLAC7-St	23.5469	20.6303	2.91662	-2.30788	4.95156	0.694742		1.13508			1.20999	1.12756
SmLAC7-Le	29.6582	20.5844	9.07373	3.84923	0.0693852	-1.15873		-0.718393			-0.765803	-0.713631
SmLAC7-Fl	30.0009	20.589	9.41193	4.18742	0.0548859	-1.26054		-0.820199			-0.874327	-0.814762
SmLAC7-Rt	25.9424	20.7621	5.1803	-0.0442054	1.03112	0.0133072	-0.438012	0.451319		0.949062	0.475542	0.443145
SmLAC7-St	23.6817	20.7303	2.95135	-2.27316	4.8338	0.684289		1.1223			1.18254	1.10197
SmLAC7-Le	30.0125	20.7844	9.22805	4.00354	0.0623468	-1.20519		-0.767174			-0.808349	-0.753279
SmLAC7-Fl	30.0286	20.6701	9.3585	4.134	0.0569564	-1.24446		-0.806446			-0.849729	-0.791839
SmLAC8-Rt	27.3112	20.7657	6.54545	0	1	0	-1.37046	1.37046		2.55206	0.537001	1.2717	1.28278	0.0213119	1.19108	1.37448		19.1769	15.5268	23.6852	74.9487	60.6829	92.5682
SmLAC8-St	42.9877	20.6911	22.2966	15.7512	1.81308e-05	-4.74158		-3.37112			-1.32094	-3.12817	-3.04421	0.0454765	-3.23988	-2.84854		0.000903208	0.000575596	0.00141729	0.00352999	0.00224959	0.00553915
SmLAC8-Le	33.5372	20.894	12.6432	6.09771	0.0146018	-1.83559		-0.465133			-0.182258	-0.431612	-0.591986	0.0835372	-0.951417	-0.232554		0.255867	0.111836	0.585391	1	0.437087	2.28787
SmLAC8-Fl	23.5217	20.6148	2.90684	-3.63861	12.4546	1.09533		2.46579			0.966195	2.28809	2.35342	0.0420716	2.1724	2.53444		225.642	148.73	342.325	881.871	581.28	1337.9
SmLAC8-Rt	27.5	20.6621	6.83782	0.292369	0.81656	-0.088012	-1.29449	1.20648		2.28081	0.52897	1.25268
SmLAC8-St	40.9845	20.6303	20.3542	13.8087	6.96891e-05	-4.15684		-2.86234			-1.25497	-2.97195
SmLAC8-Le	33.7104	20.5844	13.126	6.58056	0.0104485	-1.98095		-0.686455			-0.30097	-0.71274
SmLAC8-Fl	23.6536	20.589	3.06464	-3.48081	11.1642	1.04783		2.34232			1.02697	2.43201
SmLAC8-Rt	27.114	20.7621	6.35186	-0.193586	1.1436	0.0582752	-1.21169	1.26996		2.27156	0.559072	1.32396
SmLAC8-St	40.9639	20.7303	20.2335	13.6881	7.57661e-05	-4.12052		-2.90884			-1.28055	-3.03252
SmLAC8-Le	33.3676	20.7844	12.5832	6.03772	0.0152218	-1.81753		-0.605845			-0.266709	-0.631605
SmLAC8-Fl	23.7839	20.6701	3.11381	-3.43164	10.7901	1.03303		2.24472			0.988183	2.34016
SmLAC9-Rt	30.5916	20.8413	9.75036	0	1	0	-0.00157244	0.00157244		0.882281	0.00178225	0.00152368	0.0324767	0.0941596	-0.372659	0.437613		1.07765	0.423975	2.73913	1.07162	0.421603	2.72381
SmLAC9-St	33.7047	20.5242	13.1805	3.43013	0.0927745	-1.03257		-1.031			-1.16856	-0.999029	-1.05515	0.0293599	-1.18147	-0.928823		0.0880747	0.0658454	0.117809	0.0875819	0.065477	0.117149
SmLAC9-Le	30.1601	20.0904	10.0697	0.319361	0.801425	-0.0961371		-0.0945647			-0.107182	-0.0916324	0.00243667	0.0876292	-0.374601	0.379475		1.00563	0.422084	2.39593	1	0.419722	2.38253
SmLAC9-Fl	26.7627	20.741	6.02177	-3.72859	13.2562	1.12242		1.12399			1.27396	1.08914	1.02024	0.0359586	0.865518	1.17495		10.477	7.33699	14.9607	10.4183	7.29594	14.877
SmLAC9-Rt	29.9061	21.1535	8.75254	-0.997825	1.99699	0.300375	0.100307	0.200069		0.819077	0.244261	0.208824
SmLAC9-St	34.0214	21.1092	12.9122	3.16189	0.111732	-0.951823		-1.05213			-1.28453	-1.09817
SmLAC9-Le	30.0039	20.3366	9.66728	-0.0830844	1.05928	0.0250109		-0.0752957			-0.0919274	-0.0785909
SmLAC9-Fl	26.9086	20.5721	6.33654	-3.41382	10.6577	1.02766		0.927356			1.1322	0.967941
SmLAC9-Rt	30.0774	20.0621	10.0152	0.26488	0.832268	-0.0797368	0.0343023	-0.114039		0.863411	-0.13208	-0.112918
SmLAC9-St	34.0646	20.8444	13.2203	3.46991	0.0902514	-1.04455		-1.07885			-1.24952	-1.06824
SmLAC9-Le	30.0466	21.0058	9.0408	-0.709558	1.6353	0.213598		0.179296			0.20766	0.177533
SmLAC9-Fl	26.9394	20.6701	6.26933	-3.48103	11.1659	1.04789		1.01359			1.17394	1.00363
SmLAC10-Rt	25.1633	20.8413	4.32206	0	1	0	-1.94706	1.94706		1.51309	1.28681	1.88713	1.91134	0.0259724	1.79959	2.02309		81.5341	63.036	105.46	1772.78	1370.58	2293
SmLAC10-St	34.8688	20.5242	14.3446	10.0225	0.000961446	-3.01707		-1.07001			-0.707171	-1.03708	-0.927198	0.0775934	-1.26106	-0.59334		0.11825	0.0548207	0.25507	2.57109	1.19196	5.54594
SmLAC10-Le	35.2595	20.0904	15.1691	10.847	0.000542896	-3.26528		-1.31822			-0.871212	-1.27765	-1.33732	0.0342079	-1.4845	-1.19013		0.0459922	0.0327718	0.064546	1	0.71255	1.40341
SmLAC10-Fl	30.0655	20.741	9.32452	5.00246	0.0311968	-1.50589		0.441173			0.291571	0.427593	0.353174	0.0714851	0.0455985	0.66075		2.25514	1.1107	4.57878	49.0331	24.1498	99.5554
SmLAC10-Rt	24.877	21.1535	3.72353	-0.598534	1.51418	0.180177	-1.91746	2.09764		1.56691	1.33871	1.96324
SmLAC10-St	34.56	21.1092	13.4508	9.12875	0.00178637	-2.74803		-0.830566			-0.530067	-0.777352
SmLAC10-Le	35.9837	20.3366	15.6471	11.325	0.000389789	-3.40917		-1.49171			-0.952009	-1.39614
SmLAC10-Fl	30.5176	20.5721	9.94551	5.62344	0.020285	-1.69282		0.224637			0.143363	0.210245
SmLAC10-Rt	25.2967	20.0621	5.23455	0.912482	0.53127	-0.274684	-1.96956	1.69488		1.31955	1.28443	1.88364
SmLAC10-St	34.6	20.8444	13.7557	9.43362	0.0014461	-2.8398		-0.870241			-0.659497	-0.967163
SmLAC10-Le	35.8705	21.0058	14.8646	10.5425	0.000670466	-3.17362		-1.20406			-0.912477	-1.33816
SmLAC10-Fl	30.2745	20.6701	9.60438	5.28231	0.025696	-1.59014		0.379426			0.287542	0.421684
SmLAC11-Rt	27.2838	20.2304	7.05334	0	1	0	-0.420316	0.420316		0.492208	0.85394	0.488741	0.593401	0.0539334	0.361345	0.825458		3.92104	2.29797	6.69049	16.7262	9.80259	28.54
SmLAC11-St	30.1945	20.7763	9.41819	2.36485	0.194137	-0.711892		-0.291576			-0.592385	-0.339043	-0.309509	0.0317392	-0.446072	-0.172946		0.490333	0.358037	0.671512	2.09164	1.5273	2.86451
SmLAC11-Le	31.0735	20.8224	10.2511	3.19774	0.108989	-0.962616		-0.542301			-1.10177	-0.630584	-0.629996	0.0230105	-0.729003	-0.53099		0.234425	0.186637	0.294449	1	0.796148	1.25605
SmLAC11-Fl	28.0931	21.0173	7.07578	0.0224395	0.984566	-0.00675495		0.413561			0.840217	0.480886	0.346104	0.0678604	0.0541242	0.638084		2.21873	1.13272	4.34594	9.46455	4.83193	18.5387
SmLAC11-Rt	27.1559	20.4828	6.67312	-0.38022	1.30154	0.114458	-0.559562	0.67402		0.577201	1.16774	0.668339
SmLAC11-St	30.2912	20.2285	10.0626	3.00928	0.124198	-0.905885		-0.346323			-0.600003	-0.343403
SmLAC11-Le	31.2401	20.3518	10.8883	3.83492	0.0700766	-1.15443		-0.594865			-1.0306	-0.58985
SmLAC11-Fl	28.1856	20.1609	8.02465	0.971317	0.51004	-0.292395		0.267167			0.462866	0.264915
SmLAC11-Rt	27.1609	20.8543	6.30654	-0.746798	1.67806	0.224809	-0.480258	0.705066		0.647599	1.22153	0.623125
SmLAC11-St	30.478	20.9043	9.57368	2.52034	0.174302	-0.758698		-0.27844			-0.482397	-0.24608
SmLAC11-Le	31.4858	20.3204	11.1654	4.11208	0.0578283	-1.23786		-0.757602			-1.31254	-0.669555
SmLAC11-Fl	28.1125	20.5633	7.54924	0.495904	0.709117	-0.149282		0.330976			0.573415	0.29251
SmLAC12-Rt	27.4617	20.2304	7.23132	0	1	0	0.15529	-0.15529		0.290926	-0.533777	-0.166195	-0.0902143	0.0509546	-0.309454	0.129026		0.81243	0.490395	1.34594	1.81355	1.09468	3.00447
SmLAC12-St	26.3474	20.7763	5.57109	-1.66023	3.16067	0.49978		0.34449			1.18411	0.368682	0.371171	0.0403053	0.197752	0.544591		2.35056	1.57671	3.50422	5.24704	3.51961	7.82229
SmLAC12-Le	28.5693	20.8224	7.74693	0.515607	0.699499	-0.155213		-0.310503			-1.06729	-0.332309	-0.348743	0.0428144	-0.532958	-0.164527		0.447979	0.293117	0.684657	1	0.654311	1.52832
SmLAC12-Fl	27.3298	21.0173	6.3125	-0.918823	1.89057	0.276593		0.121303			0.416955	0.129822	0.0677856	0.0574422	-0.179368	0.314939		1.16892	0.661655	2.06509	2.60933	1.47698	4.6098
SmLAC12-Rt	27.8178	20.4828	7.33501	0.103684	0.930654	-0.0312119	-0.0352808	0.00406884		0.192187	0.0211712	0.00659182
SmLAC12-St	26.9565	20.2285	6.72797	-0.503354	1.4175	0.151525		0.186805			0.971997	0.302638
SmLAC12-Le	28.5815	20.3518	8.22969	0.998369	0.500566	-0.300539		-0.265258			-1.38021	-0.429738
SmLAC12-Fl	27.2623	20.1609	7.10143	-0.129898	1.09422	0.0391033		0.0743841			0.38704	0.120508
SmLAC12-Rt	28.0712	20.8543	7.21689	-0.0144329	1.01005	0.00434474	0.16517	-0.160825		0.450959	-0.356629	-0.111039
SmLAC12-St	25.4594	20.9043	4.55509	-2.67623	6.39185	0.805627		0.640457			1.42021	0.442193
SmLAC12-Le	28.3704	20.3204	8.04994	0.818617	0.566985	-0.246428		-0.411598			-0.912718	-0.284181
SmLAC12-Fl	27.4719	20.5633	6.90865	-0.322679	1.25065	0.0971362		-0.0680337			-0.150865	-0.0469728
SmLAC13-Rt	32.2219	21.1936	11.0284	0	1	0	0.839943	-0.839943		1.4725	-0.57042	-0.839329	-0.869539	0.0151316	-0.934645	-0.804433		0.13504	0.11624	0.15688	0.117458	0.101106	0.136455
SmLAC13-St	21.8485	20.549	1.29945	-9.7289	848.578	2.92869		2.08875			1.41851	2.08722	2.04748	0.0212574	1.95602	2.13894		111.553	90.3688	137.703	97.0297	78.6034	119.775
SmLAC13-Le	29.1501	20.7412	8.40892	-2.61944	6.14509	0.788529		-0.0514147			-0.0349167	-0.0513771	0.0605768	0.0588891	-0.192803	0.313956		1.14968	0.641501	2.06042	1	0.557983	1.79217
SmLAC13-Fl	32.4839	20.2681	12.2158	1.18741	0.439089	-0.357447		-1.19739			-0.813169	-1.19651	-1.23852	0.0231934	-1.33831	-1.13873		0.0577406	0.0458868	0.0726564	0.0502232	0.0399127	0.0631971
SmLAC13-Rt	32.3468	21.027	11.3198	0.291412	0.817102	-0.0877239	0.784959	-0.872683		1.44899	-0.60227	-0.886193
SmLAC13-St	22.2127	20.3821	1.83069	-9.19766	587.182	2.76877		1.98381			1.3691	2.01453
SmLAC13-Le	29.1219	21.186	7.93587	-3.09249	8.52964	0.930931		0.145972			0.100741	0.148232
SmLAC13-Fl	33.9565	21.3597	12.5968	1.56843	0.337174	-0.472146		-1.2571			-0.867573	-1.27657
SmLAC13-Rt	32.2961	20.8908	11.4053	0.376897	0.770092	-0.113457	0.782455	-0.895912		1.49278	-0.600165	-0.883095
SmLAC13-St	22.385	20.8334	1.55166	-9.47669	712.474	2.85277		2.07031			1.38689	2.0407
SmLAC13-Le	29.1501	21.0071	8.14306	-2.8853	7.3886	0.868562		0.0861072			0.0576825	0.0848753
SmLAC13-Fl	33.0433	20.4269	12.6164	1.58806	0.332618	-0.478054		-1.26051			-0.844405	-1.24248
SmLAC14-Rt	26.6821	21.1936	5.48855	0	1	0	-1.19625	1.19625		1.22562	0.976041	1.12104	1.11963	0.00392645	1.10274	1.13653		13.1715	12.669	13.694	97.789	94.058	101.668
SmLAC14-St	27.0574	20.549	6.50835	1.0198	0.493184	-0.306991		0.889263			0.725562	0.833353	0.851123	0.00993563	0.808374	0.893873		7.09779	6.43241	7.832	52.6961	47.7561	58.1471
SmLAC14-Le	32.8888	20.7412	12.1476	6.65905	0.00989526	-2.00457		-0.808319			-0.65952	-0.757499	-0.870655	0.0565859	-1.11412	-0.627186		0.134693	0.076891	0.235947	1	0.570861	1.75174
SmLAC14-Fl	33.9733	20.2681	13.7052	8.21662	0.00336163	-2.47345		-1.2772			-1.04208	-1.1969	-1.1001	0.0483979	-1.30834	-0.891864		0.079414	0.0491652	0.128273	0.589593	0.365017	0.952338
SmLAC14-Rt	26.6755	21.027	5.64847	0.159917	0.895077	-0.0481397	-1.08635	1.03821		1.05937	0.980028	1.12562
SmLAC14-St	26.8679	20.3821	6.48589	0.997341	0.500922	-0.30023		0.786119			0.742065	0.852307
SmLAC14-Le	33.1194	21.186	11.9334	6.44487	0.0114789	-1.9401		-0.853751			-0.805907	-0.925633
SmLAC14-Fl	33.6812	21.3597	12.3215	6.83296	0.0087715	-2.05693		-0.970577			-0.916187	-1.0523
SmLAC14-Rt	26.4484	20.8908	5.55763	0.0690789	0.953246	-0.0207948	-1.14479	1.12399		1.1607	0.968378	1.11224
SmLAC14-St	27.2119	20.8334	6.37853	0.889977	0.539623	-0.26791		0.876879			0.755475	0.86771
SmLAC14-Le	33.4167	21.0071	12.4096	6.92103	0.00825206	-2.08344		-0.938649			-0.808693	-0.928834
SmLAC14-Fl	33.247	20.4269	12.8201	7.33154	0.00620851	-2.20701		-1.06222			-0.915159	-1.05112
SmLAC15-Rt	28.0223	20.9997	7.02254	0	1	0	0.0439446	-0.0439446		0.539879	-0.081397	-0.0443316	-0.0342027	0.0105878	-0.0797584	0.0113531		0.924267	0.832227	1.02649	2.28908	2.06113	2.54224
SmLAC15-St	25.1746	20.8782	4.29645	-2.72609	6.61661	0.820636		0.776691			1.43864	0.783532	0.780384	0.00300305	0.767462	0.793305		6.03092	5.85413	6.21305	14.9365	14.4986	15.3875
SmLAC15-Le	28.336	20.1772	8.15881	1.13627	0.454935	-0.34205		-0.385995			-0.714965	-0.389395	-0.393864	0.00361012	-0.409397	-0.378331		0.403772	0.389586	0.418475	1	0.964866	1.03641
SmLAC15-Fl	28.495	20.4666	8.02844	1.0059	0.497958	-0.302807		-0.346751			-0.642276	-0.349805	-0.352317	0.00965787	-0.393871	-0.310762		0.444307	0.403765	0.48892	1.10039	0.999983	1.21088
SmLAC15-Rt	27.1735	20.2092	6.96434	-0.0582016	1.04117	0.0175204	0.063629	-0.0461086		0.555056	-0.0830702	-0.0452429
SmLAC15-St	23.9575	19.798	4.15952	-2.86302	7.27538	0.861855		0.798226			1.4381	0.783239
SmLAC15-Le	28.596	20.4272	8.16878	1.14624	0.4518	-0.345054		-0.408683			-0.736292	-0.40101
SmLAC15-Fl	27.3026	19.3506	7.95203	0.929495	0.525042	-0.279806		-0.343435			-0.618739	-0.336987
SmLAC15-Rt	27.0565	20.0621	6.99434	-0.0282032	1.01974	0.00849002	0.021388	-0.0128979		0.538967	-0.0239308	-0.0130336
SmLAC15-St	25.2502	20.8444	4.40582	-2.61672	6.13353	0.787711		0.766323			1.42183	0.77438
SmLAC15-Le	28.7433	20.5058	8.23747	1.21493	0.430795	-0.36573		-0.387118			-0.718258	-0.391188
SmLAC15-Fl	28.8384	20.6701	8.16834	1.1458	0.45194	-0.344919		-0.366307			-0.679646	-0.370158
SmLAC16-Rt	24.0165	20.9997	3.01683	0	1	0	-0.356918	0.356918		0.737087	0.484227	0.385295	0.348792	0.0184023	0.269613	0.427971		2.2325	1.86043	2.67899	18.6791	15.566	22.4149
SmLAC16-St	26.328	20.8782	5.44983	2.433	0.18518	-0.732406		-0.375488			-0.509421	-0.405341	-0.327665	0.0462406	-0.526623	-0.128708		0.470256	0.297425	0.743518	3.93459	2.48853	6.22095
SmLAC16-Le	27.0895	20.1772	6.91232	3.89549	0.0671956	-1.17266		-0.815742			-1.10671	-0.880598	-0.922565	0.0269555	-1.03855	-0.806585		0.119518	0.0915071	0.156104	1	0.765632	1.30611
SmLAC16-Fl	21.8975	20.4666	1.43096	-1.58587	3.00189	0.477394		0.834312			1.1319	0.900645	0.901439	0.0105346	0.856112	0.946766		7.96964	7.17979	8.84638	66.6813	60.0727	74.0169
SmLAC16-Rt	23.3718	20.2092	3.16255	0.145725	0.903925	-0.0438675	-0.364848	0.32098		0.782316	0.410295	0.326468
SmLAC16-St	25.1122	19.798	5.31413	2.2973	0.203443	-0.691557		-0.326709			-0.417618	-0.332295
SmLAC16-Le	27.642	20.4272	7.21483	4.198	0.054485	-1.26372		-0.898875			-1.14899	-0.914242
SmLAC16-Fl	20.5744	19.3506	1.2238	-1.79303	3.46543	0.539757		0.904604			1.15632	0.920069
SmLAC16-Rt	23.2111	20.0621	3.14891	0.132086	0.912511	-0.0397617	-0.404643	0.364882		0.867667	0.420532	0.334613
SmLAC16-St	26.0942	20.8444	5.24982	2.233	0.212717	-0.672199		-0.267555			-0.308361	-0.24536
SmLAC16-Le	28.391	20.5058	7.88512	4.86829	0.0342372	-1.4655		-1.06086			-1.22266	-0.972855
SmLAC16-Fl	21.8304	20.6701	1.16024	-1.85659	3.6215	0.558888		0.963532			1.11049	0.883602
SmLAC17-Rt	27.1977	20.2304	6.96732	0	1	0	-0.221764	0.221764		0.31747	0.698535	0.46644	0.372436	0.0681387	0.0792594	0.665613		2.35742	1.20022	4.63034	6.01953	3.06468	11.8233
SmLAC17-St	29.0467	20.7763	8.2704	1.30309	0.405258	-0.392268		-0.170504			-0.537072	-0.358625	-0.506961	0.25096	-1.58676	0.572832		0.311199	0.0258967	3.73966	0.79463	0.0661258	9.54901
SmLAC17-Le	29.7203	20.8224	8.89788	1.93056	0.262327	-0.581157		-0.359394			-1.13206	-0.75592	-0.407126	0.406082	-2.15435	1.3401		0.391628	0.00700883	21.8828	1	0.0178966	55.8764
SmLAC17-Fl	27.1978	20.5173	6.6804	-0.286915	1.22003	0.0863701		0.308134			0.970593	0.648104	0.541651	0.0941363	0.136616	0.946687		3.48058	1.36967	8.84478	8.88746	3.49737	22.5847
SmLAC17-Rt	27.477	20.4828	6.9942	0.0268862	0.981537	-0.00809354	-0.185695	0.177601		0.288627	0.61533	0.410881
SmLAC17-St	28.0509	20.2285	7.82235	0.855035	0.552852	-0.257391		-0.0716968			-0.248406	-0.165871
SmLAC17-Le	29.1823	20.3518	8.83041	1.86309	0.274886	-0.560847		-0.375153			-1.29978	-0.867918
SmLAC17-Fl	26.8507	20.1609	6.68976	-0.277561	1.21214	0.0835542		0.269249			0.93286	0.622908
SmLAC17-Rt	27.7705	20.3543	7.41618	0.448866	0.732618	-0.135122	-0.637253	0.502131		1.39712	0.359403	0.239988
SmLAC17-St	36.914	20.9043	16.0097	9.04233	0.00189665	-2.72201		-2.08476			-1.49218	-0.996389
SmLAC17-Le	26.6073	20.3204	6.28693	-0.680391	1.60257	0.204818		0.842071			0.602717	0.402459
SmLAC17-Fl	27.1874	20.5633	6.62415	-0.343171	1.26854	0.103305		0.740558			0.530059	0.353942
SmLAC18-Rt	24.6696	20.2304	4.43921	0	1	0	-0.785832	0.785832		0.832052	0.944452	1.10652	1.02749	0.0887558	0.645604	1.40937		10.6534	4.42185	25.667	24.3377	10.1017	58.6362
SmLAC18-St	31.3031	20.7763	10.5268	6.08758	0.0147047	-1.83254		-1.04671			-1.25799	-1.47387	-1.46242	0.127649	-2.01165	-0.913193		0.034481	0.00973535	0.122126	0.0787717	0.0222404	0.278996
SmLAC18-Le	28.7877	20.8224	7.96526	3.52605	0.0868064	-1.06145		-0.275616			-0.331248	-0.388092	-0.358791	0.238564	-1.38525	0.667668		0.437733	0.0411861	4.6523	1	0.0940895	10.6282
SmLAC18-Fl	25.7848	20.5173	5.26749	0.82828	0.5632	-0.249337		0.536495			0.644786	0.755434	0.793723	0.0365374	0.636515	0.95093		6.21903	4.33027	8.93162	14.2074	9.89249	20.4043
SmLAC18-Rt	25.1195	20.4828	4.63675	0.197538	0.872037	-0.0594649	-0.806378	0.746913		0.777425	0.960753	1.12562
SmLAC18-St	30.0706	20.2285	9.84205	5.40284	0.0236365	-1.62642		-0.820039			-1.05481	-1.23583
SmLAC18-Le	29.1375	20.3518	8.78562	4.34641	0.0491585	-1.3084		-0.502023			-0.645752	-0.756566
SmLAC18-Fl	25.3682	20.1609	5.20734	0.768126	0.58718	-0.231229		0.575149			0.739813	0.866769
SmLAC18-Rt	24.8195	20.3543	4.4652	0.0259946	0.982143	-0.00782516	-1.39067	1.38284		1.90534	0.725774	0.85032
SmLAC18-St	39.026	20.9043	18.1217	13.6825	7.60606e-05	-4.11884		-2.72817			-1.43186	-1.67757
SmLAC18-Le	29.0104	20.3204	8.69002	4.25081	0.0525266	-1.27962		0.11105			0.0582834	0.0682852
SmLAC18-Fl	25.522	20.5633	4.95874	0.51953	0.697599	-0.156394		1.23428			0.647799	0.758964
SmLAC19-Rt	22.8346	20.1936	2.64104	0	1	0	-1.27768	1.27768		1.30847	0.976468	1.28279	1.28194	0.0366681	1.12417	1.43971		19.1399	13.3097	27.5239	197.789	137.541	284.428
SmLAC19-St	24.2026	20.549	3.6536	1.01256	0.495666	-0.304811		0.972871			0.743516	0.976759	0.975197	0.0449302	0.781878	1.16852		9.4449	6.05171	14.7406	97.6022	62.5375	152.328
SmLAC19-Le	30.9943	20.7412	10.2531	7.6121	0.00511127	-2.29147		-1.01379			-0.774788	-1.01784	-1.01426	0.0305937	-1.1459	-0.882628		0.0967694	0.0714667	0.13103	1	0.738526	1.35405
SmLAC19-Fl	31.2619	20.2681	10.9939	8.35281	0.00305881	-2.51445		-1.23676			-0.945197	-1.24171	-1.24287	0.0222913	-1.33879	-1.14696		0.0571644	0.0458367	0.0712914	0.590728	0.47367	0.736714
SmLAC19-Rt	23.3361	20.7034	2.63263	-0.0084054	1.00584	0.00253028	-1.35552	1.35805		1.32642	1.02384	1.34502
SmLAC19-St	24.5187	20.3821	4.13666	1.49562	0.354628	-0.450227		0.90529			0.682504	0.896607
SmLAC19-Le	30.5485	20.186	10.3625	7.72144	0.00473822	-2.32439		-0.968867			-0.730435	-0.959574
SmLAC19-Fl	31.8038	20.3597	11.4441	8.80307	0.00223878	-2.64999		-1.29447			-0.97591	-1.28205
SmLAC19-Rt	23.6705	20.8908	2.77971	0.138669	0.908357	-0.0417437	-1.2528	1.21106		1.30621	0.927157	1.21801
SmLAC19-St	24.1606	20.8334	3.32728	0.686243	0.62147	-0.20658		1.04622			0.800963	1.05223
SmLAC19-Le	30.8224	20.5007	10.3217	7.68062	0.00487418	-2.3121		-1.05929			-0.81097	-1.06537
SmLAC19-Fl	31.2093	20.4269	10.7824	8.14135	0.00354167	-2.45079		-1.19799			-0.917151	-1.20486
SmLAC20-Rt	29.8269	20.1936	9.63337	0	1	0	0.511055	-0.511055		0.760253	-0.672217	-0.471566	-0.362235	0.0582494	-0.612862	-0.111608		0.434275	0.243859	0.773378	0.128948	0.0724082	0.229637
SmLAC20-St	26.2935	20.549	5.74449	-3.88888	14.8139	1.17067		0.659614			0.867624	0.608646	0.638188	0.0231177	0.538721	0.737655		4.34698	3.45717	5.46582	1.29074	1.02653	1.62295
SmLAC20-Le	26.5436	20.7412	5.80238	-3.83099	14.2313	1.15324		0.642188			0.844703	0.592567	0.527351	0.0429259	0.342656	0.712046		3.36783	2.20118	5.15283	1	0.653589	1.53001
SmLAC20-Fl	30.8306	20.2681	10.5625	0.929117	0.52518	-0.279692		-0.790747			-1.04011	-0.729647	-0.803304	0.0381573	-0.967482	-0.639126		0.157288	0.107775	0.229548	0.0467031	0.0320013	0.068159
SmLAC20-Rt	29.8304	20.7034	9.12697	-0.506403	1.4205	0.152442	0.495512	-0.343069		0.702859	-0.488105	-0.34241
SmLAC20-St	26.2986	20.3821	5.91658	-3.71679	13.1482	1.11887		0.623354			0.886883	0.622157
SmLAC20-Le	26.3657	20.186	6.17972	-3.45365	10.956	1.03965		0.544141			0.774182	0.543096
SmLAC20-Fl	31.0857	20.3597	10.726	1.09263	0.468907	-0.328914		-0.824425			-1.17296	-0.822842
SmLAC20-Rt	29.754	20.8908	8.86322	-0.770149	1.70545	0.231838	0.481203	-0.249365		0.641415	-0.388773	-0.272728
SmLAC20-St	26.7914	20.8334	5.95802	-3.67535	12.7758	1.10639		0.625187			0.974699	0.68376
SmLAC20-Le	27.1797	20.5007	6.679	-2.95437	7.75091	0.889353		0.40815			0.636327	0.44639
SmLAC20-Fl	31.066	20.4269	10.6391	1.00578	0.498001	-0.30277		-0.783973			-1.22225	-0.857422
SmLAC21-Rt	20.5694	20.2304	0.339006	0	1	0	-1.23936	1.23936		0.82701	1.4986	1.24607	1.24623	0.000177958	1.24547	1.247		17.6291	17.5981	17.6602	42.3234	42.2489	42.3981
SmLAC21-St	26.7726	20.7763	5.99625	5.65724	0.0198153	-1.703		-0.463643			-0.560625	-0.466155	-0.447155	0.0155618	-0.514112	-0.380198		0.357145	0.306117	0.416679	0.857422	0.734916	1.00035
SmLAC21-Le	26.5644	20.8224	5.742	5.403	0.0236339	-1.62646		-0.387107			-0.46808	-0.389205	-0.38035	0.00573498	-0.405026	-0.355674		0.416534	0.393527	0.440885	1	0.944766	1.05846
SmLAC21-Fl	26.4817	20.7347	5.74698	5.40798	0.0235525	-1.62796		-0.388607			-0.469894	-0.390713	-0.418726	0.0165628	-0.48999	-0.347462		0.381306	0.323601	0.449302	0.915427	0.77689	1.07867
SmLAC21-Rt	20.7335	20.4828	0.250724	-0.0882818	1.0631	0.0265755	-1.22504	1.25161		0.834845	1.49922	1.24659
SmLAC21-St	26.0255	20.2285	5.79701	5.45801	0.0227497	-1.64302		-0.417985			-0.500674	-0.416307
SmLAC21-Le	26.0352	20.3518	5.68338	5.34437	0.0246141	-1.60882		-0.383778			-0.459699	-0.382236
SmLAC21-Fl	26.5118	20.609	5.90286	5.56386	0.0211403	-1.67489		-0.44985			-0.538843	-0.448044
SmLAC21-Rt	21.1882	20.8543	0.33383	-0.0051761	1.00359	0.00155816	-1.24617	1.24772		0.83262	1.49855	1.24603
SmLAC21-St	26.9098	20.9043	6.00553	5.66652	0.0196883	-1.70579		-0.459626			-0.552024	-0.459003
SmLAC21-Le	26.0286	20.3204	5.70816	5.36916	0.0241949	-1.61628		-0.37011			-0.444513	-0.369609
SmLAC21-Fl	26.4305	20.5633	5.86721	5.5282	0.0216693	-1.66415		-0.417988			-0.502015	-0.417422
SmLAC22-Rt	37.2219	20.2304	16.9915	0	1	0	1.69115	-1.69115		1.25661	-1.3458	-1.62921	-1.62296	0.0116675	-1.67316	-1.57276		0.0238256	0.0212247	0.0267451	0.00334126	0.00297652	0.00375069
SmLAC22-St	28.8477	20.7763	8.0714	-8.92012	484.422	2.68522		0.994077			0.791076	0.957673	0.99042	0.0358896	0.835999	1.14484		9.78182	6.85487	13.9585	1.37179	0.961316	1.95752
SmLAC22-Le	29.1501	20.8224	8.32771	-8.66381	405.57	2.60807		0.916919			0.729674	0.883341	0.853133	0.0268994	0.737394	0.968872		7.13071	5.46254	9.30833	1	0.766057	1.30539
SmLAC22-Fl	32.8387	20.7347	12.104	-4.88754	29.6004	1.4713		-0.21985			-0.174954	-0.211799	-0.220596	0.0213758	-0.312569	-0.128623		0.601734	0.486891	0.743665	0.0843862	0.0682808	0.10429
SmLAC22-Rt	37.3468	20.4828	16.864	-0.127494	1.09239	0.0383796	1.66322	-1.62484		1.22911	-1.32196	-1.60036
SmLAC22-St	28.1127	20.2285	7.88421	-9.10731	551.535	2.74157		1.07836			0.877344	1.06211
SmLAC22-Le	29.1219	20.3518	8.77	-8.22151	298.485	2.47492		0.811705			0.660399	0.799476
SmLAC22-Fl	32.9565	20.609	12.3475	-4.64404	25.0032	1.398		-0.265222			-0.215783	-0.261226
SmLAC22-Rt	37.5961	20.8543	16.7417	-0.24977	1.18902	0.0751884	1.6271	-1.55191		1.14606	-1.35412	-1.6393
SmLAC22-St	29.4985	20.9043	8.59419	-8.39733	337.17	2.52785		0.900754			0.785957	0.951476
SmLAC22-Le	29.1501	20.3204	8.82971	-8.1618	286.383	2.45695		0.829853			0.724092	0.876583
SmLAC22-Fl	32.7433	20.5633	12.1801	-4.81147	28.0799	1.4484		-0.1787			-0.155925	-0.188762
SmLAC23-Rt	26.691	21.0309	5.66011	0	1	0	-0.0816272	0.0816272		0.0554309	1.4726	0.0966084	0.0627317	0.0340534	-0.0837884	0.209252		1.1554	0.82454	1.61902	1.12618	0.803688	1.57807
SmLAC23-St	26.7256	20.6649	6.06075	0.400635	0.757525	-0.120603		-0.0389759			-0.703145	-0.0461292	-0.055244	0.0166077	-0.126701	0.0162132		0.880554	0.746963	1.03804	0.858285	0.728072	1.01179
SmLAC23-Le	26.1234	20.1477	5.97574	0.31563	0.8035	-0.095014		-0.0133868			-0.241504	-0.0158437	0.0111243	0.0284048	-0.111092	0.13334		1.02595	0.774298	1.35938	1	0.754717	1.325
SmLAC23-Fl	26.4951	20.4666	6.02849	0.368374	0.774655	-0.110892		-0.0292645			-0.527946	-0.0346355	-0.0186119	0.022021	-0.113361	0.0761366		0.95805	0.770264	1.19162	0.933821	0.750784	1.16148
SmLAC23-Rt	26.6294	20.5916	6.03778	0.377666	0.769682	-0.113689	-0.110201	-0.00348783		0.0425715	-0.0819288	-0.00537487
SmLAC23-St	26.4576	20.2428	6.21473	0.554617	0.680838	-0.166957		-0.0567557			-1.33318	-0.0874625
SmLAC23-Le	26.4304	20.5506	5.8798	0.219689	0.858751	-0.066133		0.0440678			1.03515	0.0679101
SmLAC23-Fl	26.4954	20.5229	5.97246	0.312345	0.805332	-0.0940251		0.0161757			0.379965	0.0249273
SmLAC23-Rt	25.9294	20.5621	5.36726	-0.292851	1.22506	0.0881568	-0.0578823	0.146039		0.0988102	1.47798	0.0969614
SmLAC23-St	26.5576	20.5444	6.0132	0.353089	0.782906	-0.10629		-0.0484082			-0.489911	-0.0321402
SmLAC23-Le	26.5304	20.5844	5.94592	0.285811	0.82028	-0.0860376		-0.0281553			-0.284944	-0.0186935
SmLAC23-Fl	26.7533	20.6701	6.08319	0.423073	0.745834	-0.127358		-0.0694755			-0.703121	-0.0461277
SmLAC24-Rt	28.4597	21.0309	7.42883	0	1	0	-0.522374	0.522374		0.585495	0.892192	0.501647	0.511331	0.0274748	0.393116	0.629546		3.24587	2.47238	4.26133	10.3669	7.89652	13.6102
SmLAC24-St	31.395	20.6649	10.7301	3.30131	0.101439	-0.993794		-0.47142			-0.805166	-0.452715	-0.466693	0.00831057	-0.50245	-0.430935		0.341435	0.314449	0.370736	1.0905	1.00431	1.18409
SmLAC24-Le	31.1097	20.1477	10.962	3.53322	0.0863766	-1.0636		-0.54123			-0.924398	-0.519755	-0.50432	0.00815157	-0.539393	-0.469246		0.313098	0.288807	0.339433	1	0.922416	1.08411
SmLAC24-Fl	28.002	20.4666	7.53545	0.106623	0.928759	-0.0320968		0.490277			0.837372	0.470824	0.459681	0.0294505	0.332966	0.586397		2.88192	2.15261	3.85831	9.20451	6.8752	12.323
SmLAC24-Rt	27.9143	20.5916	7.32269	-0.106134	1.07634	0.0319497	-0.493144	0.525094		0.524392	1.00134	0.563016
SmLAC24-St	30.7533	20.2428	10.5104	3.0816	0.118126	-0.927655		-0.434511			-0.8286	-0.465891
SmLAC24-Le	31.1702	20.5506	10.6197	3.19083	0.109513	-0.960535		-0.467391			-0.8913	-0.501146
SmLAC24-Fl	28.3382	20.5229	7.81529	0.386459	0.765005	-0.116336		0.376808			0.718562	0.404021
SmLAC24-Rt	28.049	20.5621	7.48689	0.0580639	0.960552	-0.017479	-0.499029	0.48155		0.576904	0.834714	0.46933
SmLAC24-St	31.272	20.5444	10.7276	3.29879	0.101616	-0.993036		-0.494007			-0.856307	-0.481471
SmLAC24-Le	31.3481	20.5844	10.7637	3.33488	0.0991063	-1.0039		-0.50487			-0.875137	-0.492058
SmLAC24-Fl	28.0382	20.6701	7.36804	-0.0607848	1.04303	0.0182981		0.517327			0.89673	0.504199
SmLAC25-Rt	30.8913	20.0621	10.8291	0	1	0	-0.800147	0.800147		0.692312	1.15576	0.784692	0.816487	0.0213902	0.724452	0.908521		6.5537	5.30215	8.10068	16.9841	13.7406	20.9931
SmLAC25-St	36.1363	20.4435	15.6928	4.86364	0.0343479	-1.4641		-0.663953			-0.959037	-0.651128	-0.679387	0.0141448	-0.740247	-0.618526		0.209225	0.181867	0.240699	0.542211	0.471311	0.623776
SmLAC25-Le	35.104	20.0058	15.0982	4.26903	0.0518675	-1.28511		-0.484958			-0.70049	-0.47559	-0.413555	0.033428	-0.557384	-0.269726		0.385874	0.277087	0.537371	1	0.718077	1.39261
SmLAC25-Fl	32.9987	20.6701	12.3286	1.49947	0.353684	-0.451384		0.348763			0.503766	0.342027	0.276455	0.0427514	0.0925102	0.460399		1.88997	1.2374	2.88669	4.8979	3.20675	7.48091
SmLAC25-Rt	30.9622	20.1628	10.7994	-0.0297501	1.02084	0.00895567	-0.838747	0.847702		0.671439	1.26252	0.857172
SmLAC25-St	36.1328	20.2428	15.89	5.06085	0.0299594	-1.52347		-0.68472			-1.01978	-0.692369
SmLAC25-Le	35.1068	20.3056	14.8012	3.97206	0.0637222	-1.19571		-0.356963			-0.531638	-0.36095
SmLAC25-Fl	33.0939	20.1229	12.971	2.14187	0.226586	-0.644766		0.19398			0.288902	0.196147
SmLAC25-Rt	30.9913	20.0621	10.9291	0.1	0.933033	-0.030103	-0.830715	0.800612		0.673068	1.1895	0.807597
SmLAC25-St	36.3199	20.4435	15.8764	5.04724	0.0302434	-1.51937		-0.688655			-1.02316	-0.694663
SmLAC25-Le	35.504	20.5844	14.9196	4.09044	0.0587024	-1.23134		-0.400629			-0.595229	-0.404124
SmLAC25-Fl	33.2999	20.6701	12.6298	1.80063	0.28705	-0.542042		0.288672			0.42889	0.291191
SmLAC26-Rt	32.3391	20.0621	12.2769	0	1	0	0.473514	-0.473514		0.319391	-1.48256	-0.480251	-0.48022	0.00323808	-0.494152	-0.466287		0.330964	0.320515	0.341753	0.233427	0.226058	0.241037
SmLAC26-St	30.8289	20.4435	10.3853	-1.89162	3.71051	0.569433		0.0959187			0.300318	0.0972833	0.119923	0.0244809	0.0145899	0.225255		1.31802	1.03417	1.67979	0.929595	0.729393	1.18475
SmLAC26-Le	30.1681	20.0058	10.1623	-2.11462	4.33077	0.636565		0.163051			0.510506	0.165371	0.151629	0.0126638	0.0971405	0.206117		1.41784	1.25066	1.60737	1	0.882088	1.13367
SmLAC26-Fl	30.6614	20.6701	9.99124	-2.28568	4.87595	0.688059		0.214545			0.671731	0.217597	0.208669	0.0294467	0.0819696	0.335368		1.61685	1.20773	2.16455	1.14035	0.851807	1.52665
SmLAC26-Rt	32.2946	20.1628	12.1319	-0.145059	1.10578	0.0436672	0.476807	-0.43314		0.295639	-1.4651	-0.474596
SmLAC26-St	30.6519	20.2428	10.4091	-1.86783	3.64982	0.562272		0.0854653			0.289087	0.0936452
SmLAC26-Le	30.6156	20.3056	10.31	-1.96693	3.90934	0.592104		0.115297			0.389994	0.126332
SmLAC26-Fl	30.044	20.1229	9.92107	-2.35586	5.11898	0.709184		0.232377			0.786017	0.254618
SmLAC26-Rt	32.5946	20.0621	12.5325	0.255554	0.837665	-0.0769294	0.458134	-0.535063		0.356774	-1.49972	-0.485813
SmLAC26-St	30.5809	20.4435	10.1373	-2.13962	4.40645	0.644089		0.185956			0.521214	0.168839
SmLAC26-Le	30.7424	20.5844	10.158	-2.11892	4.3437	0.637859		0.179726			0.503752	0.163183
SmLAC26-Fl	30.8625	20.6701	10.1924	-2.08456	4.24146	0.627515		0.169382			0.474759	0.153791
SmLAC27-Rt	28.3557	20.5936	7.76215	0	1	0	-0.0466804	0.0466804		0.0437975	1.06582	0.0528817	0.0478269	0.0147152	-0.0154874	0.111141		1.11642	0.964967	1.29164	1.12055	0.968539	1.29642
SmLAC27-St	28.654	20.549	8.10495	0.342807	0.788506	-0.103195		-0.0565148			-1.29037	-0.0640225	-0.0288668	0.0195458	-0.112965	0.0552318		0.935693	0.770965	1.13562	0.939156	0.773818	1.13982
SmLAC27-Le	28.685	20.7412	7.94377	0.18162	0.881713	-0.054673		-0.00799256			-0.182489	-0.00905433	-0.00160433	0.0255819	-0.111674	0.108466		0.996313	0.77326	1.28371	1	0.776122	1.28846
SmLAC27-Fl	28.1261	20.2681	7.858	0.0958492	0.935721	-0.0288535		0.0178269			0.407031	0.0201951	-0.0173558	0.026969	-0.133394	0.0986826		0.960825	0.735539	1.25511	0.964381	0.738261	1.25976
SmLAC27-Rt	28.7193	20.7034	8.01585	0.253698	0.838744	-0.0763706	-0.0967159	0.0203453		0.0499953	0.406944	0.0201908
SmLAC27-St	28.4537	20.3821	8.07166	0.309516	0.806913	-0.0931735		0.00354233			0.0708532	0.00351544
SmLAC27-Le	28.5277	20.5981	7.9296	0.167448	0.890417	-0.0504068		0.0463091			0.926269	0.0459575
SmLAC27-Fl	28.6763	20.3597	8.31662	0.554472	0.680906	-0.166913		-0.0701967			-1.40407	-0.0696638
SmLAC27-Rt	28.4557	20.8908	7.56491	-0.197243	1.14651	0.059376	-0.0187501	0.0781261		0.0550545	1.41907	0.0704082
SmLAC27-St	28.754	20.8334	7.92062	0.158468	0.895976	-0.0477037		-0.0289536			-0.525909	-0.0260934
SmLAC27-Le	28.685	20.7068	7.9782	0.216055	0.860916	-0.0650391		-0.046289			-0.840785	-0.0417162
SmLAC27-Fl	28.2609	20.4269	7.83401	0.0718653	0.951407	-0.0216336		-0.0028835			-0.0523753	-0.00259864
SmLAC28-Rt	28.9012	20.5936	8.30764	0	1	0	-1.16832	1.16832		2.19322	0.532694	1.17373	1.21963	0.0246857	1.11342	1.32585		16.5818	12.9843	21.1761	1509.27	1181.83	1927.45
SmLAC28-St	38.5907	20.549	18.0417	9.73403	0.00117426	-2.93023		-1.76192			-0.803348	-1.77008	-1.74691	0.0284894	-1.86949	-1.62433		0.0179099	0.0135055	0.0237505	1.63015	1.22927	2.16176
SmLAC28-Le	39.2918	20.7412	18.5506	10.2429	0.000825222	-3.08343		-1.91511			-0.873197	-1.92399	-1.95914	0.0282392	-2.08064	-1.83763		0.0109866	0.00830541	0.0145334	1	0.755956	1.32283
SmLAC28-Fl	24.123	20.2681	3.85492	-4.45272	21.8979	1.3404		2.50872			1.14385	2.52034	2.48641	0.0177362	2.4101	2.56272		306.486	257.097	365.362	27896.3	23400.9	33255.1
SmLAC28-Rt	28.9501	20.7034	8.2467	-0.060941	1.04315	0.0183451	-1.20777	1.22612		2.20209	0.556799	1.22684
SmLAC28-St	38.3134	20.3821	17.9313	9.62369	0.0012676	-2.89702		-1.68925			-0.767111	-1.69024
SmLAC28-Le	39.6076	20.5981	19.0095	10.7019	0.000600367	-3.22158		-2.01381			-0.9145	-2.015
SmLAC28-Fl	24.4512	20.3597	4.09157	-4.21607	18.585	1.26916		2.47694			1.12481	2.4784
SmLAC28-Rt	28.8012	20.8908	7.91039	-0.397243	1.31699	0.119582	-1.14529	1.26487		2.21485	0.571088	1.25833
SmLAC28-St	38.8907	20.8334	18.0573	9.74969	0.00116158	-2.93495		-1.78966			-0.808029	-1.7804
SmLAC28-Le	39.2918	20.7068	18.585	10.2774	0.000805758	-3.0938		-1.9485			-0.879748	-1.93842
SmLAC28-Fl	24.323	20.4269	3.89612	-4.41152	21.2814	1.328		2.47329			1.11669	2.46049
SmLAC29-Rt	27.0791	20.2304	6.8487	0	1	0	-0.132757	0.132757		0.673077	0.197238	0.134799	0.137859	0.0083155	0.10208	0.173638		1.3736	1.26497	1.49155	2.68764	2.47509	2.91843
SmLAC29-St	30.6045	20.7763	9.82817	2.97947	0.126791	-0.896911		-0.764154			-1.13531	-0.775913	-0.723386	0.0272483	-0.840626	-0.606146		0.189066	0.144336	0.247659	0.369935	0.282414	0.484581
SmLAC29-Le	28.8184	20.8224	7.99597	1.14727	0.451479	-0.345363		-0.212606			-0.315872	-0.215878	-0.291512	0.0380756	-0.455338	-0.127686		0.511079	0.350479	0.745271	1	0.685763	1.45823
SmLAC29-Fl	25.2207	20.7347	4.48599	-2.36271	5.14336	0.711247		0.844004			1.25395	0.856991	0.877039	0.0113595	0.828162	0.925915		7.53423	6.73228	8.43169	14.7418	13.1727	16.4978
SmLAC29-Rt	27.5325	20.4828	7.04972	0.201019	0.869936	-0.0605128	-0.189024	0.128511		0.701331	0.183238	0.125231
SmLAC29-St	30.0387	20.2285	9.81019	2.96149	0.128381	-0.891498		-0.702475			-1.00163	-0.684549
SmLAC29-Le	28.9773	20.3518	8.62543	1.77673	0.291843	-0.53485		-0.345827			-0.4931	-0.337002
SmLAC29-Fl	25.0301	20.609	4.42114	-2.42756	5.37981	0.730767		0.91979			1.31149	0.896319
SmLAC29-Rt	27.7911	20.8543	6.9368	0.0881042	0.940758	-0.026522	-0.178374	0.151852		0.675895	0.224668	0.153546
SmLAC29-St	30.2045	20.4317	9.77279	2.92409	0.131753	-0.88024		-0.701866			-1.03842	-0.709695
SmLAC29-Le	28.8184	20.3204	8.49797	1.64927	0.3188	-0.496481		-0.318107			-0.470646	-0.321656
SmLAC29-Fl	25.1207	20.5633	4.5574	-2.29129	4.89495	0.689748		0.868122			1.2844	0.877805
SmLAC30-Rt	32.2695	20.2304	12.0391	0	1	0	-0.0440976	0.0440976		0.699689	0.0630246	0.0447939	0.138529	0.0533035	-0.0908179	0.367875		1.37572	0.811301	2.33279	1.5312	0.902994	2.59644
SmLAC30-St	30.2989	20.7763	9.52256	-2.51655	5.72213	0.757558		0.801656			1.14573	0.814314	0.813413	0.0186631	0.733112	0.893714		6.50748	5.40894	7.82914	7.24295	6.02025	8.71398
SmLAC30-Le	32.8085	20.8224	11.9861	-0.0530111	1.03743	0.0159579		0.0600555			0.0858318	0.0610038	-0.0465029	0.0540372	-0.279006	0.186		0.898457	0.52601	1.53462	1	0.585459	1.70806
SmLAC30-Fl	35.9293	20.7347	15.1946	3.15552	0.112226	-0.949906		-0.905809			-1.29459	-0.920112	-0.905439	0.0142916	-0.966931	-0.843947		0.124326	0.107912	0.143236	0.138377	0.120108	0.159425
SmLAC30-Rt	32.1274	20.4828	11.6446	-0.394519	1.3145	0.118762	-0.0235609	0.142323		0.715288	0.198973	0.141417
SmLAC30-St	29.52	20.2285	9.29145	-2.74767	6.71631	0.827131		0.850692			1.1893	0.845278
SmLAC30-Le	32.8364	20.3518	12.4846	0.445475	0.734343	-0.134101		-0.11054			-0.15454	-0.109837
SmLAC30-Fl	35.6579	20.609	15.0489	3.00978	0.124155	-0.906035		-0.882474			-1.23373	-0.876859
SmLAC30-Rt	32.2695	20.8543	11.4152	-0.62391	1.54105	0.187816	-0.0436561	0.231472		0.717233	0.322729	0.229375
SmLAC30-St	29.9989	20.4317	9.56718	-2.47193	5.54786	0.744126		0.787782			1.09836	0.780646
SmLAC30-Le	32.8085	20.3204	12.4881	0.448994	0.732554	-0.135161		-0.0915045			-0.12758	-0.0906756
SmLAC30-Fl	35.8293	20.5633	15.2661	3.22694	0.106806	-0.971405		-0.927749			-1.29351	-0.919346
SmLAC31-Rt	29.3457	20.5936	8.75209	0	1	0	0.165337	-0.165337		0.510519	-0.323861	-0.16061	-0.159686	0.0131937	-0.216454	-0.102918		0.692331	0.6075	0.789009	1.32834	1.16558	1.51383
SmLAC31-St	26.2374	20.549	5.68842	-3.06368	8.36101	0.922259		0.756922			1.48265	0.73528	0.73671	0.00185651	0.728722	0.744698		5.45393	5.35454	5.55517	10.4642	10.2735	10.6585
SmLAC31-Le	29.7353	20.7412	8.99411	0.242016	0.845563	-0.072854		-0.238191			-0.466567	-0.231381	-0.282997	0.0267176	-0.397953	-0.16804		0.521199	0.399988	0.679141	1	0.767438	1.30304
SmLAC31-Fl	29.9449	20.5681	9.3768	0.624708	0.648551	-0.188056		-0.353393			-0.692223	-0.343289	-0.294027	0.0250494	-0.401806	-0.186248		0.508128	0.396455	0.651256	0.974921	0.76066	1.24954
SmLAC31-Rt	29.3709	20.7034	8.66746	-0.0846315	1.06042	0.0254766	0.166619	-0.141143		0.513219	-0.275014	-0.136386
SmLAC31-St	26.0557	20.3821	5.67369	-3.0784	8.44679	0.926692		0.760073			1.48099	0.734457
SmLAC31-Le	29.8995	20.5981	9.30136	0.549271	0.683365	-0.165347		-0.331966			-0.646832	-0.320778
SmLAC31-Fl	29.5115	20.3597	9.15187	0.399775	0.757976	-0.120344		-0.286964			-0.559145	-0.277292
SmLAC31-Rt	29.3619	20.5908	8.77108	0.0189895	0.986924	-0.0057164	0.164637	-0.170354		0.46403	-0.367118	-0.182062
SmLAC31-St	26.2374	20.3336	5.90382	-2.84827	7.20137	0.857415		0.692778			1.49296	0.740392
SmLAC31-Le	29.8346	20.7068	9.12782	0.375723	0.770719	-0.113104		-0.277741			-0.598542	-0.29683
SmLAC31-Fl	29.4449	20.4269	9.018	0.265905	0.831677	-0.0800453		-0.244683			-0.527299	-0.2615
SmLAC32-Rt	25.0139	20.5936	4.42036	0	1	0	-0.831467	0.831467		1.0079	0.824947	0.886547	0.89211	0.00486078	0.871196	0.913024		7.80028	7.43354	8.1851	45.4947	43.3558	47.7392
SmLAC32-St	31.0465	20.549	10.4975	6.07711	0.0148118	-1.82939		-0.997925			-0.990099	-1.06403	-1.08029	0.0317608	-1.21694	-0.94363		0.0831217	0.0606818	0.11386	0.484803	0.353924	0.664081
SmLAC32-Le	30.3729	20.7412	9.63172	5.21136	0.0269913	-1.56878		-0.73731			-0.731527	-0.786152	-0.765851	0.0379506	-0.92914	-0.602563		0.171454	0.117723	0.249711	1	0.686612	1.45643
SmLAC32-Fl	24.7483	20.5681	4.18018	-0.240177	1.18114	0.0723004		0.903768			0.89668	0.963637	0.954027	0.0109602	0.906869	1.00118		8.99553	8.06992	10.0273	52.466	47.0674	58.4839
SmLAC32-Rt	24.9413	20.7034	4.23784	-0.182516	1.13486	0.0549429	-0.880555	0.935497		1.13217	0.826287	0.887987
SmLAC32-St	31.3505	20.3821	10.9685	6.5481	0.0106862	-1.97118		-1.09062			-0.963302	-1.03523
SmLAC32-Le	30.81	20.5981	10.2119	5.7915	0.0180545	-1.74341		-0.86286			-0.762129	-0.819039
SmLAC32-Fl	24.3235	20.3597	3.96383	-0.45653	1.37224	0.137429		1.01798			0.899144	0.966284
SmLAC32-Rt	24.9139	20.5908	4.32312	-0.0972428	1.06973	0.029273	-0.880301	0.909574		1.08394	0.839136	0.901796
SmLAC32-St	31.5033	20.3336	11.1697	6.74929	0.00929522	-2.03174		-1.15144			-1.06227	-1.14159
SmLAC32-Le	30.3712	20.7068	9.66447	5.24411	0.0263854	-1.57864		-0.698335			-0.644255	-0.692363
SmLAC32-Fl	24.6483	20.4269	4.22138	-0.19898	1.14789	0.0598989		0.9402			0.86739	0.93216
SmLAC33-Rt	25.5167	20.9489	4.56777	0	1	0	-0.722391	0.722391		0.675132	1.07	0.708004	0.703502	0.00256441	0.692468	0.714536		5.05245	4.9257	5.18246	34.7352	33.8639	35.629
SmLAC33-St	26.5236	20.5156	6.00798	1.44021	0.368514	-0.433546		0.288845			0.427835	0.283092	0.299382	0.00872016	0.261862	0.336902		1.99242	1.82752	2.17221	13.6978	12.5641	14.9338
SmLAC33-Le	30.4597	20.6362	9.82355	5.25578	0.0261729	-1.58215		-0.859758			-1.27347	-0.842635	-0.837269	0.00473434	-0.857639	-0.816898		0.145456	0.138791	0.152441	1	0.954179	1.04802
SmLAC33-Fl	28.0519	20.5812	7.4707	2.90293	0.1337	-0.873869		-0.151478			-0.224368	-0.148461	-0.165615	0.0118965	-0.216802	-0.114428		0.682944	0.607013	0.768372	4.69519	4.17318	5.28251
SmLAC33-Rt	25.6749	20.8548	4.82008	0.252313	0.839549	-0.0759538	-0.784603	0.708649		0.670702	1.05658	0.699123
SmLAC33-St	26.6502	20.4934	6.15683	1.58906	0.332388	-0.478355		0.306249			0.456609	0.302132
SmLAC33-Le	30.704	20.6969	10.0071	5.43936	0.0230457	-1.63741		-0.852806			-1.27151	-0.841342
SmLAC33-Fl	28.2601	20.5475	7.71262	3.14485	0.113059	-0.946695		-0.162092			-0.241675	-0.159913
SmLAC33-Rt	25.6236	20.8829	4.7407	0.17293	0.887039	-0.0520572	-0.731558	0.679501		0.639224	1.06301	0.703379
SmLAC33-St	26.5339	20.5402	5.99374	1.42597	0.372169	-0.429259		0.302299			0.472916	0.312922
SmLAC33-Le	30.2997	20.6451	9.65459	5.08682	0.0294249	-1.53129		-0.799727			-1.25109	-0.827829
SmLAC33-Fl	28.1861	20.5833	7.60279	3.03502	0.122002	-0.913631		-0.182073			-0.284835	-0.188471
SmLAC34-Rt	22.6993	20.9489	1.75034	0	1	0	-1.64912	1.64912		1.99374	0.827151	1.66008	1.64236	0.025261	1.53367	1.75105		43.8895	34.1721	56.3702	6969.79	5426.64	8951.77
SmLAC34-St	31.8296	20.5156	11.314	9.56366	0.00132145	-2.87895		-1.22982			-0.616842	-1.238	-1.20102	0.0239297	-1.30398	-1.09806		0.0629475	0.0496613	0.0797884	9.99628	7.88637	12.6707
SmLAC34-Le	35.039	20.6362	14.4028	12.6525	0.000155318	-3.80878		-2.15965			-1.08322	-2.17401	-2.20086	0.018024	-2.27841	-2.12331		0.0062971	0.00526732	0.00752821	1	0.836467	1.1955
SmLAC34-Fl	22.0285	20.5812	1.44729	-0.30305	1.23375	0.0912271		1.74035			0.872908	1.75192	1.75952	0.0270924	1.64295	1.87609		57.4804	43.9492	75.1777	9128.08	6979.28	11938.5
SmLAC34-Rt	22.5002	20.8548	1.64543	-0.104913	1.07543	0.0315821	-1.58205	1.61363		1.93407	0.834319	1.67447
SmLAC34-St	31.2005	20.4934	10.7071	8.95679	0.0020125	-2.69626		-1.11421			-0.576095	-1.15622
SmLAC34-Le	34.8579	20.6969	14.1609	12.4106	0.000183671	-3.73596		-2.15391			-1.11366	-2.23511
SmLAC34-Fl	22.0572	20.5475	1.50973	-0.24061	1.18149	0.072431		1.65448			0.85544	1.71686
SmLAC34-Rt	22.4993	20.8829	1.61639	-0.133956	1.0973	0.0403246	-1.62057	1.6609		2.09316	0.79349	1.59253
SmLAC34-St	31.8621	20.5402	11.3219	9.57155	0.00131424	-2.88132		-1.26075			-0.602319	-1.20885
SmLAC34-Le	35.3783	20.6451	14.7331	12.9828	0.000123536	-3.90821		-2.28763			-1.09291	-2.19346
SmLAC34-Fl	21.447	20.5833	0.86369	-0.886651	1.84888	0.266909		1.88748			0.901739	1.80978
SmLAC35-Rt	24.0889	20.4614	3.6275	0	1	0	-1.32077	1.32077		1.31517	1.00426	1.33969	1.38638	0.0335931	1.24184	1.53092		24.3435	17.452	33.9565	68.1842	48.8814	95.1093
SmLAC35-St	33.9158	20.5213	13.3945	9.76698	0.00114775	-2.94015		-1.61939			-1.23131	-1.64259	-1.64561	0.0231466	-1.7452	-1.54602		0.0226145	0.0179802	0.0284432	0.0633413	0.0503611	0.079667
SmLAC35-Le	30.0664	20.476	9.59035	5.96285	0.0160326	-1.795		-0.474229			-0.360583	-0.481024	-0.4473	0.0364964	-0.604331	-0.290269		0.357026	0.248696	0.512544	1	0.696576	1.43559
SmLAC35-Fl	26.4179	20.9702	5.44765	1.82015	0.283192	-0.54792		0.772848			0.58764	0.783922	0.706529	0.0414601	0.528141	0.884918		5.08779	3.37397	7.67216	14.2505	9.4502	21.4891
SmLAC35-Rt	24.0482	20.4752	3.57299	-0.0545054	1.0385	0.0164077	-1.40358	1.41999		1.38482	1.02539	1.36789
SmLAC35-St	34.7202	20.6121	14.1081	10.4806	0.000699889	-3.15497		-1.75139			-1.2647	-1.68713
SmLAC35-Le	30.1288	20.5477	9.58111	5.95362	0.0161355	-1.79222		-0.388635			-0.280638	-0.374376
SmLAC35-Fl	26.3972	20.499	5.8982	2.2707	0.207229	-0.68355		0.720033			0.519945	0.693615
SmLAC35-Rt	23.9322	20.5246	3.40765	-0.219852	1.16461	0.0661821	-1.3506	1.41679		1.30205	1.08812	1.45157
SmLAC35-St	33.8874	20.5625	13.3249	9.69742	0.00120444	-2.91921		-1.56861			-1.20472	-1.60712
SmLAC35-Le	30.1305	20.439	9.6915	6.064	0.014947	-1.82545		-0.474843			-0.364689	-0.4865
SmLAC35-Fl	26.6179	20.5855	6.03236	2.40486	0.188827	-0.723936		0.626668			0.481293	0.642052
SmLAC36-Rt	29.6584	20.4614	9.19699	0	1	0	-0.331238	0.331238		1.39948	0.236687	0.252278	-0.132687	0.390656	-1.81354	1.54817		0.736739	0.0153624	35.3321	1.01388	0.0211413	48.6231
SmLAC36-St	37.3259	20.5213	16.8046	7.60762	0.00512717	-2.29012		-1.95888			-1.39973	-1.49193	-0.849299	0.646043	-3.629	1.9304		0.141482	0.000234965	85.1917	0.194704	0.000323353	117.239
SmLAC36-Le	29.8955	20.476	9.4195	0.222505	0.857076	-0.0669806		0.264257			0.188826	0.201264	-0.138673	0.345073	-1.6234	1.34606		0.726653	0.0238012	22.1848	1	0.0327545	30.5301
SmLAC36-Fl	26.7385	20.9702	5.76826	-3.42873	10.7684	1.03215		1.36339			0.974213	1.03839	1.12066	0.089764	0.734436	1.50688		13.2026	5.42545	32.1279	18.169	7.46636	44.2136
SmLAC36-Rt	29.6693	20.4752	9.19417	-0.00282579	1.00196	0.000850647	0.367266	-0.366415		0.427314	-0.857486	-0.91397
SmLAC36-St	27.9994	20.6121	7.38728	-1.80972	3.50573	0.544779		0.177513			0.415415	0.44278
SmLAC36-Le	29.6285	20.5477	9.08073	-0.116263	1.08392	0.0349985		-0.332267			-0.777573	-0.828793
SmLAC36-Fl	26.7447	20.499	6.24567	-2.95132	7.73457	0.888436		0.52117			1.21964	1.29998
SmLAC36-Rt	29.7584	20.5246	9.23385	0.0368576	0.974776	-0.0110952	-0.350155	0.33906		1.37083	0.24734	0.263633
SmLAC36-St	37.3259	20.5625	16.7634	7.56638	0.00527586	-2.27771		-1.92755			-1.40612	-1.49875
SmLAC36-Le	29.8955	20.439	9.45654	0.259545	0.835351	-0.0781308		0.272025			0.198438	0.21151
SmLAC36-Fl	26.5725	20.5855	5.98698	-3.21002	9.25362	0.966312		1.31647			0.960345	1.02361
SmLAC37-Rt	27.2644	20.4484	6.81604	0	1	0	-0.195702	0.195702		0.836843	0.233857	0.194597	0.195976	0.0103983	0.151236	0.240717		1.57028	1.41656	1.74067	2.06576	1.86355	2.28992
SmLAC37-St	31.2286	20.3224	10.9062	4.09011	0.0587156	-1.23125		-1.03555			-1.23744	-1.0297	-1.04329	0.0118906	-1.09445	-0.992124		0.0905138	0.0804551	0.10183	0.119075	0.105842	0.133961
SmLAC37-Le	28.8341	20.8873	7.94683	1.13079	0.456665	-0.340402		-0.144701			-0.172913	-0.143884	-0.119104	0.0286344	-0.242308	0.00409963		0.760144	0.57239	1.00948	1	0.753002	1.32802
SmLAC37-Fl	24.5549	20.3593	4.19556	-2.62048	6.14954	0.788843		0.984544			1.1765	0.978988	0.966413	0.0084731	0.929956	1.00287		9.25578	8.51053	10.0663	12.1764	11.1959	13.2426
SmLAC37-Rt	27.3556	20.4393	6.91637	0.100331	0.932819	-0.0302027	-0.205098	0.174895		0.814426	0.214747	0.178695
SmLAC37-St	31.2731	20.3067	10.9664	4.15039	0.056313	-1.24939		-1.04429			-1.28224	-1.06698
SmLAC37-Le	28.2861	20.5871	7.69895	0.882905	0.542274	-0.265781		-0.0606828			-0.0745099	-0.0620012
SmLAC37-Fl	24.7837	20.376	4.4077	-2.40834	5.30863	0.724982		0.93008			1.14201	0.950288
SmLAC37-Rt	27.1644	20.4269	6.73753	-0.0785121	1.05593	0.0236345	-0.194348	0.217983		0.845093	0.25794	0.214637
SmLAC37-St	31.2669	20.3196	10.9473	4.13124	0.0570653	-1.24363		-1.04928			-1.24161	-1.03317
SmLAC37-Le	28.5942	20.6217	7.97252	1.15648	0.448605	-0.348136		-0.153788			-0.181977	-0.151427
SmLAC37-Fl	24.5549	20.3656	4.18927	-2.62677	6.17641	0.790736		0.985084			1.16565	0.969963
SmLAC38-Rt	28.1231	20.4484	7.67472	0	1	0	0.0424755	-0.0424755		0.738192	-0.0575399	-0.0415412	-0.0634511	0.0111394	-0.11138	-0.0155221		0.86407	0.773784	0.96489	0.985369	0.882409	1.10034
SmLAC38-St	30.752	20.3224	10.4296	2.75485	0.148152	-0.829293		-0.871769			-1.18095	-0.852593	-0.819182	0.0185133	-0.898838	-0.739525		0.151642	0.12623	0.182169	0.172929	0.14395	0.207742
SmLAC38-Le	28.487	20.8873	7.59969	-0.0750318	1.05338	0.0225868		-0.0198887			-0.0269424	-0.0194512	-0.0570501	0.0220901	-0.152096	0.037996		0.8769	0.704537	1.09143	1	0.803441	1.24465
SmLAC38-Fl	24.7898	20.3593	4.4305	-3.24422	9.47564	0.976608		0.934133			1.26543	0.913585	0.939683	0.0142153	0.878519	1.00085		8.70328	7.55996	10.0195	9.92506	8.62124	11.4261
SmLAC38-Rt	28.2983	20.4393	7.85901	0.184289	0.880083	-0.0554765	0.0169212	-0.0723977		0.737106	-0.0982188	-0.0709096
SmLAC38-St	30.6938	20.3067	10.3871	2.71237	0.152579	-0.816506		-0.833427			-1.13067	-0.816296
SmLAC38-Le	28.3948	20.5871	7.80763	0.132901	0.911996	-0.0400072		-0.0569284			-0.0772323	-0.0557583
SmLAC38-Fl	24.7963	20.376	4.42032	-3.25441	9.54277	0.979674		0.962753			1.30613	0.942964
SmLAC38-Rt	28.3871	20.4269	7.96019	0.285469	0.820475	-0.0859348	-0.0114192	-0.0745156		0.690566	-0.107905	-0.0779026
SmLAC38-St	30.5383	20.3196	10.2186	2.54389	0.17148	-0.765786		-0.754367			-1.09239	-0.788656
SmLAC38-Le	28.6392	20.6217	8.01751	0.342786	0.788517	-0.103189		-0.0917697			-0.13289	-0.0959409
SmLAC38-Fl	25.0199	20.3656	4.65432	-3.02041	8.11396	0.909233		0.920652			1.33318	0.962499
SmLAC39-Rt	32.9448	20.3806	12.5643	0	1	0	1.25457	-1.25457		0.83994	-1.49364	-1.24835	-1.24754	0.00165079	-1.25464	-1.24043		0.056554	0.0556366	0.0574865	0.0264	0.0259718	0.0268354
SmLAC39-St	27.0195	20.2451	6.77441	-5.78985	55.3247	1.74292		0.48835			0.581411	0.485928	0.512612	0.0174216	0.437652	0.587571		3.25545	2.73938	3.86875	1.51968	1.27877	1.80598
SmLAC39-Le	27.8821	20.5171	7.36499	-5.19927	36.7397	1.56514		0.310567			0.369749	0.309027	0.330859	0.0277841	0.211313	0.450404		2.14219	1.62672	2.82101	1	0.759372	1.31688
SmLAC39-Fl	27.4146	20.5316	6.88304	-5.68123	51.312	1.71022		0.455651			0.54248	0.453391	0.404066	0.0277613	0.284619	0.523513		2.53552	1.92584	3.33821	1.18361	0.899002	1.55831
SmLAC39-Rt	32.9571	20.4107	12.5464	-0.0178306	1.01244	0.00536754	1.24608	-1.24071		0.833324	-1.48887	-1.24436
SmLAC39-St	26.8565	20.2379	6.61854	-5.94572	61.6369	1.78984		0.54376			0.652519	0.545358
SmLAC39-Le	27.8855	20.4461	7.43942	-5.12484	34.8923	1.54273		0.296649			0.355983	0.297521
SmLAC39-Fl	27.5746	20.4795	7.09509	-5.46917	44.2981	1.64639		0.400305			0.480371	0.401481
SmLAC39-Rt	32.9025	20.4233	12.4792	-0.0850518	1.06073	0.0256032	1.27294	-1.24734		0.834057	-1.49551	-1.2499
SmLAC39-St	26.8907	20.2343	6.65639	-5.90787	60.041	1.77845		0.505508			0.606084	0.506549
SmLAC39-Le	27.5819	20.526	7.05593	-5.50834	45.5171	1.65817		0.385235			0.461881	0.386028
SmLAC39-Fl	27.6146	20.4635	7.15107	-5.41319	42.6121	1.62953		0.356593			0.427541	0.357327
SmLAC40-Rt	27.85	20.3806	7.46942	0	1	0	-0.993447	0.993447		1.2148	0.817783	0.989417	0.981285	0.00485783	0.960383	1.00219		9.57822	9.12816	10.0505	239.791	228.524	251.614
SmLAC40-St	33.0903	20.2451	12.8451	5.37572	0.024085	-1.61825		-0.624807			-0.514328	-0.622273	-0.623476	0.0143288	-0.685128	-0.561824		0.237971	0.206477	0.274269	5.95761	5.16916	6.86632
SmLAC40-Le	35.9552	20.5171	15.4382	7.96873	0.00399184	-2.39883		-1.40538			-1.15688	-1.39968	-1.39855	0.00972361	-1.44039	-1.35671		0.039944	0.0362756	0.0439834	1	0.908161	1.10113
SmLAC40-Fl	27.8572	20.5316	7.3256	-0.143822	1.10483	0.0432946		1.03674			0.853423	1.03254	1.04074	0.00454208	1.0212	1.06028		10.9835	10.5002	11.489	274.971	262.872	287.627
SmLAC40-Rt	28.0858	20.4107	7.67513	0.205706	0.867114	-0.0619238	-1.01785	0.955922		1.18911	0.803896	0.972615
SmLAC40-St	33.0452	20.2379	12.8072	5.33781	0.0247263	-1.60684		-0.588995			-0.495324	-0.599281
SmLAC40-Le	35.9159	20.4461	15.4698	8.00039	0.00390518	-2.40836		-1.39051			-1.16937	-1.4148
SmLAC40-Fl	27.9298	20.4795	7.45035	-0.0190717	1.01331	0.00574116		1.02359			0.8608	1.04146
SmLAC40-Rt	27.9	20.4233	7.47677	0.00734944	0.994919	-0.0022124	-0.996887	0.994675		1.22571	0.811506	0.981822
SmLAC40-St	33.199	20.2343	12.9647	5.49531	0.022169	-1.65425		-0.657368			-0.536314	-0.648874
SmLAC40-Le	35.9552	20.526	15.4292	7.95979	0.00401665	-2.39614		-1.39925			-1.14158	-1.38117
SmLAC40-Fl	27.7168	20.4635	7.25332	-0.216109	1.1616	0.0650554		1.06194			0.866386	1.04822
SmLAC41-Rt	28.8233	20.6458	8.17751	0	1	0	-0.102802	0.102802		0.0813689	1.26341	0.0823658	0.0608574	0.0154634	-0.005676	0.127391		1.15042	0.987016	1.34088	1.08999	0.93517	1.27045
SmLAC41-St	29.15	20.3558	8.79416	0.616643	0.652187	-0.185628		-0.0828259			-1.01791	-0.0663608	-0.0112342	0.0276238	-0.13009	0.107621		0.974464	0.741157	1.28121	0.923278	0.702226	1.21391
SmLAC41-Le	29.2391	20.7979	8.44115	0.263637	0.832985	-0.0793627		0.0234393			0.288062	0.0187798	0.0234333	0.011952	-0.0279919	0.0748585		1.05544	0.937579	1.18812	1	0.888331	1.12571
SmLAC41-Fl	29.0123	20.3491	8.66324	0.485724	0.714139	-0.146217		-0.0434154			-0.533563	-0.0347848	-0.0730565	0.0192907	-0.156058	0.00994464		0.845169	0.69814	1.02316	0.800774	0.661468	0.969419
SmLAC41-Rt	29.0839	20.629	8.45493	0.277418	0.825066	-0.0835112	-0.117951	0.0344402		0.0727621	0.473327	0.0308578
SmLAC41-St	28.7456	20.2485	8.49706	0.31955	0.80132	-0.0961941		0.0217573			0.29902	0.0194941
SmLAC41-Le	29.0556	20.657	8.39855	0.221035	0.85795	-0.0665381		0.0514134			0.706596	0.0460654
SmLAC41-Fl	29.266	20.3392	8.92682	0.749302	0.594891	-0.225562		-0.107611			-1.47894	-0.0964173
SmLAC41-Rt	29.0458	20.7095	8.33632	0.158803	0.895768	-0.0478046	-0.0918957	0.0440911		0.0414492	1.06374	0.0693487
SmLAC41-St	28.715	20.26	8.45498	0.277468	0.825038	-0.0835262		0.00836953			0.201922	0.013164
SmLAC41-Le	29.2391	20.7678	8.47126	0.29375	0.815779	-0.0884277		0.00346802			0.0836691	0.00545467
SmLAC41-Fl	29.0233	20.3547	8.66858	0.491062	0.711501	-0.147824		-0.0559287			-1.34933	-0.0879674
SmLAC42-Rt	30.8158	20.6458	10.17	0	1	0	0.348665	-0.348665		1.60224	-0.217611	-0.345072	-0.364168	0.0277627	-0.483621	-0.244714		0.432347	0.328382	0.569227	0.159058	0.120809	0.209415
SmLAC42-St	23.1618	20.3558	2.806	-7.36402	164.737	2.21679		1.86813			1.16595	1.84888	1.86455	0.0163834	1.79405	1.93504		73.2058	62.2377	86.1069	26.9319	22.8968	31.6781
SmLAC42-Le	28.3088	20.7979	7.5109	-2.65912	6.31649	0.800476		0.451811			0.281987	0.447156	0.434278	0.00881788	0.396338	0.472219		2.71818	2.49079	2.96632	1	0.916346	1.09129
SmLAC42-Fl	35.9093	20.3491	15.5602	5.39019	0.0238447	-1.62261		-1.97127			-1.23032	-1.95096	-1.93466	0.0194916	-2.01852	-1.85079		0.0116237	0.00958249	0.0140997	0.00427627	0.00352533	0.00518718
SmLAC42-Rt	31.137	20.629	10.508	0.337979	0.791149	-0.101742	0.309815	-0.411556		1.55805	-0.264148	-0.418869
SmLAC42-St	23.1967	20.2485	2.94817	-7.22186	149.278	2.174		1.86418			1.19648	1.8973
SmLAC42-Le	28.4355	20.657	7.77846	-2.39156	5.24726	0.719932		0.410118			0.263225	0.417404
SmLAC42-Fl	35.6679	20.3392	15.3287	5.15871	0.0279945	-1.55293		-1.86274			-1.19556	-1.89584
SmLAC42-Rt	30.8158	20.7095	10.1063	-0.0636856	1.04513	0.0191713	0.350048	-0.330877		1.59691	-0.207199	-0.328562
SmLAC42-St	23.0868	20.26	2.82683	-7.3432	162.376	2.21052		1.86047			1.16505	1.84746
SmLAC42-Le	28.3088	20.7678	7.54101	-2.62901	6.18601	0.791411		0.441363			0.276386	0.438274
SmLAC42-Fl	35.9093	20.3547	15.5546	5.38455	0.023938	-1.62091		-1.97096			-1.23424	-1.95717
SmLAC43-Rt	26.5426	20.2473	6.29532	0	1	0	0.116458	-0.116458		0.240347	-0.484542	-0.105906	-0.127422	0.0162129	-0.19718	-0.0576633		0.745724	0.635067	0.875662	1.181	1.00575	1.38678
SmLAC43-St	24.9875	20.101	4.88657	-1.40875	2.65507	0.424076		0.307617			1.27989	0.279744	0.290799	0.00576162	0.266009	0.315589		1.95343	1.84505	2.06818	3.09364	2.92199	3.27536
SmLAC43-Le	27.3854	20.6511	6.73432	0.439007	0.737642	-0.132154		-0.248612			-1.03439	-0.226085	-0.199671	0.0174677	-0.274828	-0.124513		0.631436	0.531095	0.750736	1	0.84109	1.18893
SmLAC43-Fl	26.0755	20.3579	5.71759	-0.57772	1.49249	0.173911		0.057453			0.239042	0.0522472	0.0362934	0.00803071	0.00174009	0.0708468		1.08716	1.00401	1.17719	1.72173	1.59005	1.86431
SmLAC43-Rt	26.563	20.2041	6.35893	0.0636101	0.956867	-0.0191485	0.112544	-0.131692		0.180816	-0.728322	-0.159189
SmLAC43-St	25.1924	20.093	5.09937	-1.19595	2.29095	0.360016		0.247472			1.36864	0.299143
SmLAC43-Le	27.0892	20.7098	6.37947	0.0841499	0.94334	-0.0253316		-0.137875			-0.762518	-0.166663
SmLAC43-Fl	26.2267	20.3787	5.84805	-0.447261	1.36345	0.134639		0.0220954			0.122198	0.0267087
SmLAC43-Rt	26.6426	20.2166	6.42602	0.130701	0.913387	-0.0393451	0.0863898	-0.125735		0.234544	-0.536082	-0.117171
SmLAC43-St	25.0373	20.0752	4.96205	-1.33326	2.51972	0.401352		0.314962			1.34287	0.29351
SmLAC43-Le	27.3854	20.6418	6.74361	0.448292	0.73291	-0.134949		-0.221339			-0.9437	-0.206263
SmLAC43-Fl	26.2803	20.3787	5.90166	-0.393653	1.31372	0.118501		0.0321116			0.136911	0.0299244
SmLAC44-Rt	25.0785	20.2473	4.83124	0	1	0	-0.449393	0.449393		1.06907	0.420358	0.563125	0.639512	0.0584373	0.388077	0.890948		4.36026	2.44387	7.77943	0.146418	0.0820651	0.261234
SmLAC44-St	30.5037	20.101	10.4027	5.57146	0.0210293	-1.67718		-1.22778			-1.14845	-1.53851	-1.18017	0.36185	-2.73708	0.376748		0.0660439	0.00183197	2.38093	0.00221776	6.15176e-05	0.0799519
SmLAC44-Le	22.8868	20.6511	2.23566	-2.59559	6.04435	0.781349		1.23074			1.15122	1.54222	1.47392	0.0566857	1.23002	1.71782		29.7796	16.9832	52.2177	1	0.570297	1.75347
SmLAC44-Fl	28.1847	20.3579	7.82678	2.99554	0.125387	-0.901747		-0.452354			-0.423127	-0.566834	-0.933264	0.362992	-2.49509	0.628563		0.11661	0.00319823	4.2517	0.00391577	0.000107397	0.142772
SmLAC44-Rt	24.7183	20.2041	4.51427	-0.316973	1.24571	0.0954184	-0.952794	1.04821		1.86159	0.563074	0.754312
SmLAC44-St	30.1966	20.093	10.1036	5.27233	0.0258745	-1.58713		-0.634335			-0.340749	-0.456479
SmLAC44-Le	22.4215	20.7098	1.71179	-3.11945	8.69057	0.939048		1.89184			1.01625	1.3614
SmLAC44-Fl	36.0344	20.3787	15.6558	10.8245	0.000551426	-3.25851		-2.30572			-1.23858	-1.65924
SmLAC44-Rt	24.8523	20.2166	4.63572	-0.195519	1.14514	0.058857	-0.42944	0.488297		1.08823	0.448706	0.601101
SmLAC44-St	30.5037	20.0752	10.4284	5.59719	0.0206575	-1.68492		-1.25548			-1.15369	-1.54552
SmLAC44-Le	22.8029	20.6418	2.16107	-2.67017	6.36503	0.803801		1.23324			1.13325	1.51814
SmLAC44-Fl	28.1847	20.3787	7.80602	2.97477	0.127205	-0.895496		-0.466056			-0.428268	-0.573722
SmLAC45-Rt	34.0939	20.5208	13.5731	0	1	0	0.810098	-0.810098		1.77037	-0.457588	-0.790379	-0.886287	0.0535916	-1.11687	-0.655701		0.129931	0.0764058	0.220952	0.836762	0.492058	1.42294
SmLAC45-St	22.3733	20.2957	2.07754	-11.4956	2887.48	3.46052		2.65042			1.4971	2.58591	2.58789	0.0011979	2.58273	2.59304		387.156	382.588	391.778	2493.3	2463.89	2523.07
SmLAC45-Le	34.439	20.8948	13.5442	-0.028887	1.02022	0.00869586		-0.801402			-0.452676	-0.781895	-0.808889	0.0185958	-0.8889	-0.728878		0.155278	0.129152	0.18669	1	0.831742	1.2023
SmLAC45-Fl	34.8358	20.5026	14.3333	0.760136	0.590441	-0.228824		-1.03892			-0.58684	-1.01363	-0.892709	0.071092	-1.19859	-0.586825		0.128024	0.0633004	0.258926	0.82448	0.407658	1.66749
SmLAC45-Rt	34.0013	20.4815	13.5198	-0.0532811	1.03762	0.0160392	0.891079	-0.875039		1.69292	-0.516883	-0.892799
SmLAC45-St	22.5532	20.373	2.18024	-11.3929	2689.08	3.4296		2.53852			1.4995	2.59005
SmLAC45-Le	34.0613	20.8429	13.2185	-0.354672	1.2787	0.106767		-0.784312			-0.46329	-0.80023
SmLAC45-Fl	34.0274	20.4938	13.5336	-0.0395488	1.02779	0.0119054		-0.879173			-0.519325	-0.897017
SmLAC45-Rt	34.5215	20.5024	14.0191	0.445994	0.734078	-0.134258	0.836493	-0.970751		1.71854	-0.564869	-0.975683
SmLAC45-St	22.5733	20.3316	2.24166	-11.3315	2577	3.41111		2.57462			1.49814	2.5877
SmLAC45-Le	34.439	20.8533	13.5857	0.0125563	0.991334	-0.00377982		-0.840273			-0.488945	-0.844543
SmLAC45-Fl	33.8358	20.5049	13.331	-0.242157	1.18276	0.0728964		-0.763597			-0.444328	-0.767477
SmLAC46-Rt	32.9115	20.5208	12.3907	0	1	0	0.667615	-0.667615		0.693546	-0.962611	-0.670677	-0.613968	0.0340332	-0.760401	-0.467534		0.243239	0.17362	0.340773	0.0569184	0.0406275	0.0797418
SmLAC46-St	28.5654	20.2957	8.26966	-4.12103	17.4001	1.24055		0.572938			0.8261	0.575566	0.57318	0.00626277	0.546234	0.600127		3.74266	3.5175	3.98224	0.875792	0.823103	0.931853
SmLAC46-Le	28.9955	20.8948	8.10078	-4.28992	19.5611	1.29139		0.623779			0.899405	0.62664	0.63078	0.00573083	0.606122	0.655438		4.27346	4.03759	4.52311	1	0.944805	1.05842
SmLAC46-Fl	32.4331	20.5026	11.9306	-0.460126	1.37566	0.138512		-0.529103			-0.762895	-0.53153	-0.589993	0.0343385	-0.73774	-0.442246		0.257044	0.18292	0.361205	0.0601489	0.0428036	0.0845229
SmLAC46-Rt	32.5006	20.4815	12.0191	-0.3716	1.29379	0.111863	0.663601	-0.551738		0.695122	-0.793728	-0.553012
SmLAC46-St	28.6988	20.373	8.32583	-4.06487	16.7358	1.22365		0.560046			0.80568	0.561339
SmLAC46-Le	28.901	20.8429	8.05814	-4.33255	20.1478	1.30423		0.640627			0.921603	0.642106
SmLAC46-Fl	32.8358	20.4938	12.342	-0.0487206	1.03435	0.0146663		-0.648934			-0.933554	-0.650432
SmLAC46-Rt	32.7981	20.5024	12.2958	-0.0949405	1.06802	0.0285799	0.651041	-0.622461		0.701513	-0.887312	-0.618214
SmLAC46-St	28.6108	20.3316	8.27921	-4.11148	17.2854	1.23768		0.586639			0.836248	0.582636
SmLAC46-Le	28.9955	20.8533	8.14222	-4.24847	19.0072	1.27892		0.627877			0.895033	0.623594
SmLAC46-Fl	32.6996	20.5049	12.1947	-0.195945	1.14547	0.0589853		-0.592055			-0.843969	-0.588016
SmLAC47-Rt	24.5378	20.2241	4.31372	0	1	0	-0.870399	0.870399		1.10947	0.784521	0.844127	0.848432	0.00450128	0.829065	0.867799		7.05394	6.74628	7.37564	10.7658	10.2962	11.2567
SmLAC47-St	32.2904	20.101	12.1894	7.8757	0.00425774	-2.37082		-1.50042			-1.35238	-1.45513	-1.45009	0.00282667	-1.46226	-1.43793		0.0354737	0.0344941	0.0364812	0.0541402	0.0526451	0.0556778
SmLAC47-Le	28.4364	20.6411	7.79524	3.48152	0.0895278	-1.04804		-0.177643			-0.160116	-0.172281	-0.183613	0.00650224	-0.21159	-0.155636		0.655219	0.614342	0.698817	1	0.937612	1.06654
SmLAC47-Fl	24.9008	20.3787	4.52211	0.208393	0.865501	-0.0627324		0.807666			0.727978	0.783288	0.785275	0.00594761	0.759684	0.810865		6.09922	5.75022	6.46942	9.30867	8.77601	9.87366
SmLAC47-Rt	24.4704	20.2273	4.24316	-0.070563	1.05013	0.0212416	-0.842948	0.86419		1.08446	0.796886	0.857432
SmLAC47-St	32.061	20.093	11.968	7.65426	0.00496406	-2.30416		-1.46122			-1.34741	-1.44979
SmLAC47-Le	28.4389	20.7098	7.72916	3.41544	0.0937238	-1.02815		-0.185202			-0.170778	-0.183754
SmLAC47-Fl	24.8941	20.3787	4.51543	0.201708	0.86952	-0.0607203		0.782228			0.721307	0.776111
SmLAC47-Rt	24.5877	20.2166	4.37107	0.0573553	0.961024	-0.0172657	-0.828093	0.810828		1.03401	0.784158	0.843737
SmLAC47-St	31.7539	20.0752	11.6787	7.36496	0.00606631	-2.21708		-1.38898			-1.3433	-1.44536
SmLAC47-Le	28.3283	20.6418	7.68647	3.37275	0.0965385	-1.0153		-0.187206			-0.181049	-0.194804
SmLAC47-Fl	24.9008	20.3787	4.52211	0.208393	0.865501	-0.0627324		0.765361			0.740186	0.796425
SmLAC48-Rt	36.1651	20.2241	15.941	0	1	0	1.56692	-1.56692		1.05782	-1.48127	-1.60901	-1.60954	0.00306497	-1.62273	-1.59635		0.0245731	0.0238381	0.0253307	0.00768285	0.00745306	0.00791972
SmLAC48-St	28.4255	20.101	8.32451	-7.61647	196.239	2.29279		0.725869			0.686193	0.745368	0.754701	0.0199464	0.668879	0.840523		5.68461	4.66529	6.92665	1.77731	1.45862	2.16564
SmLAC48-Le	29.6383	20.6411	8.99716	-6.94382	123.111	2.0903		0.523381			0.494773	0.53744	0.504937	0.0210131	0.414525	0.59535		3.19843	2.59732	3.93867	1	0.812059	1.23144
SmLAC48-Fl	30.0592	20.3787	9.68053	-6.26045	76.6627	1.88458		0.317667			0.300303	0.326201	0.349902	0.0149571	0.285547	0.414257		2.23822	1.92995	2.59572	0.699785	0.603406	0.811558
SmLAC48-Rt	36.6699	20.2273	16.4426	0.5016	0.706323	-0.150997	1.53222	-1.68321		1.13951	-1.47713	-1.60452
SmLAC48-St	28.1807	20.093	8.08772	-7.85326	231.242	2.36407		0.831849			0.730004	0.792957
SmLAC48-Le	29.9382	20.7098	9.22846	-6.71252	104.874	2.02067		0.488451			0.428649	0.465614
SmLAC48-Fl	30.0241	20.3787	9.64549	-6.29549	78.5475	1.89513		0.362914			0.318482	0.345947
SmLAC48-Rt	36.1651	20.2166	15.9485	0.00749754	0.994817	-0.00225699	1.57587	-1.57813		1.06138	-1.48687	-1.61509
SmLAC48-St	28.4255	20.0752	8.35024	-7.59074	192.77	2.28504		0.709167			0.668158	0.725778
SmLAC48-Le	29.6868	20.6418	9.04493	-6.89605	119.102	2.07592		0.500045			0.471129	0.511758
SmLAC48-Fl	29.8592	20.3787	9.48053	-6.46045	88.0623	1.94479		0.368917			0.347584	0.377558
SmLAC49-Rt	30.3724	20.598	9.77443	0	1	0	1.04858	-1.04858		1.29119	-0.8121	-1.0466	-1.00272	0.0406303	-1.17753	-0.827898		0.0993764	0.0664455	0.148628	0.0228918	0.015306	0.0342372
SmLAC49-St	21.7211	20.5169	1.20415	-8.57028	380.112	2.57991		1.53133			1.18599	1.52845	1.50472	0.0136426	1.44602	1.56341		31.968	27.9265	36.5944	7.36396	6.43297	8.42968
SmLAC49-Le	24.7662	20.4925	4.27374	-5.50069	45.2764	1.65587		0.607295			0.470337	0.606152	0.637604	0.016964	0.564614	0.710594		4.34114	3.66956	5.13563	1	0.845298	1.18301
SmLAC49-Fl	30.3126	20.4004	9.91222	0.137785	0.908914	-0.0414773		-1.09005			-0.844223	-1.088	-1.1396	0.0425453	-1.32266	-0.956545		0.0725099	0.0475707	0.110524	0.0167029	0.0109581	0.0254595
SmLAC49-Rt	30.322	20.4958	9.82622	0.0517907	0.964738	-0.0155906	1.02626	-1.04185		1.29105	-0.806978	-1.04
SmLAC49-St	22.0188	20.6602	1.35857	-8.41586	341.528	2.53343		1.50717			1.1674	1.5045
SmLAC49-Le	24.9281	20.7003	4.22778	-5.54665	46.7421	1.66971		0.643451			0.498394	0.642311
SmLAC49-Fl	30.4626	20.414	10.0485	0.274114	0.826958	-0.0825164		-1.10877			-0.858817	-1.10681
SmLAC49-Rt	30.2208	20.9918	9.22899	-0.545439	1.45946	0.164193	1.08237	-0.918172		1.28404	-0.715063	-0.921545
SmLAC49-St	21.8137	20.5372	1.27648	-8.49795	361.524	2.55814		1.47577			1.14932	1.48119
SmLAC49-Le	24.5908	20.6108	3.98005	-5.79438	55.4986	1.74428		0.661917			0.515494	0.664349
SmLAC49-Fl	30.6566	20.4265	10.23	0.455609	0.729202	-0.137152		-1.21952			-0.949748	-1.224
SmLAC50-Rt	25.2806	20.598	4.68264	0	1	0	-0.051353	0.051353		0.0362731	1.41573	0.0794239	0.0538687	0.0160101	-0.0150171	0.122754		1.13206	0.966013	1.32664	1.11208	0.948969	1.30324
SmLAC50-St	25.3739	20.5169	4.85699	0.174348	0.886168	-0.0524839		-0.00113092			-0.0311778	-0.0017491	-0.0425661	0.0210828	-0.133278	0.048146		0.906638	0.735736	1.11724	0.890642	0.722755	1.09753
SmLAC50-Le	25.4129	20.4925	4.92043	0.237788	0.848045	-0.0715812		-0.0202282			-0.557664	-0.0312855	0.00773071	0.030233	-0.122351	0.137813		1.01796	0.754482	1.37345	1	0.74117	1.34922
SmLAC50-Fl	25.3533	20.4004	4.95287	0.270228	0.829188	-0.0813468		-0.0299938			-0.826889	-0.0463893	-0.0190333	0.0232007	-0.118858	0.0807912		0.957121	0.760575	1.20446	0.940234	0.747156	1.18321
SmLAC50-Rt	25.3095	20.4958	4.81377	0.131129	0.913116	-0.0394738	-0.0565522	0.0170784		0.0392947	0.434623	0.0243828
SmLAC50-St	25.6559	20.6602	4.99571	0.313073	0.804926	-0.0942443		-0.0376921			-0.959214	-0.0538129
SmLAC50-Le	25.4144	20.7003	4.71404	0.0314013	0.978469	-0.00945273		0.0470995			1.19862	0.0672438
SmLAC50-Fl	25.3725	20.414	4.95849	0.275847	0.825966	-0.0830381		-0.0264858			-0.67403	-0.0378138
SmLAC50-Rt	25.4064	20.9918	4.41465	-0.267986	1.20413	0.0806719	-0.0148705	0.0955424		0.0927351	1.03027	0.0577993
SmLAC50-St	25.6654	20.5372	5.12815	0.44551	0.734324	-0.134112		-0.119242			-1.28583	-0.0721363
SmLAC50-Le	25.4129	20.6108	4.80214	0.1195	0.920507	-0.0359731		-0.0211026			-0.227557	-0.0127662
SmLAC50-Fl	25.0097	20.4265	4.58321	-0.099429	1.07135	0.0299311		0.0448016			0.483114	0.0271032
SmLAC51-Rt	28.9402	20.6716	8.26862	0	1	0	-0.031901	0.031901		0.395762	0.0806065	0.032023	0.0908062	0.0304664	-0.0402803	0.221893		1.23255	0.911422	1.66684	0.705404	0.521617	0.953948
SmLAC51-St	27.8943	20.5246	7.36972	-0.898899	1.86464	0.270596		0.302497			0.764339	0.303653	0.250003	0.0277748	0.130498	0.369509		1.77829	1.35051	2.34158	1.01774	0.772912	1.34011
SmLAC51-Le	28.3299	20.7317	7.59824	-0.670383	1.5915	0.201806		0.233707			0.590523	0.2346	0.242368	0.0143492	0.180628	0.304108		1.7473	1.51575	2.01422	1	0.867482	1.15276
SmLAC51-Fl	31.0248	20.7631	10.2618	1.99317	0.251186	-0.600005		-0.568104			-1.43547	-0.570277	-0.583178	0.00660229	-0.611585	-0.55477		0.261109	0.244577	0.27876	0.149436	0.139974	0.159537
SmLAC51-Rt	28.7213	20.5593	8.16202	-0.106603	1.07669	0.0320908	-0.07427	0.106361		0.397485	0.267584	0.106305
SmLAC51-St	28.2436	20.4286	7.81502	-0.4536	1.36945	0.136547		0.210817			0.530377	0.210706
SmLAC51-Le	28.0299	20.4125	7.61735	-0.651265	1.57054	0.19605		0.27032			0.680076	0.270178
SmLAC51-Fl	31.1737	20.7067	10.467	2.19835	0.217887	-0.661768		-0.587498			-1.47804	-0.587188
SmLAC51-Rt	28.4843	20.5316	7.95275	-0.315865	1.24476	0.0950848	-0.0394462	0.134531		0.39858	0.337526	0.134091
SmLAC51-St	28.0943	20.48	7.61427	-0.654346	1.5739	0.196978		0.236424			0.593166	0.23565
SmLAC51-Le	28.1576	20.4989	7.65868	-0.609938	1.52619	0.18361		0.223056			0.559627	0.222326
SmLAC51-Fl	31.0687	20.6958	10.3729	2.1043	0.232564	-0.633457		-0.594011			-1.49032	-0.592067
SmLAC52-Rt	29.7624	20.6716	9.09083	0	1	0	0.273042	-0.273042		0.820732	-0.332681	-0.273986	-0.279584	0.0145424	-0.342155	-0.217013		0.52531	0.454825	0.606718	0.22228	0.192455	0.256727
SmLAC52-St	25.8264	20.5246	5.30179	-3.78904	13.8234	1.14061		0.867573			1.05707	0.870575	0.904344	0.0180656	0.826614	0.982074		8.02313	6.70832	9.59564	3.39491	2.83856	4.06031
SmLAC52-Le	27.5343	20.7317	6.80265	-2.28817	4.88438	0.688809		0.415767			0.506581	0.417206	0.373515	0.0274861	0.255252	0.491778		2.36328	1.79992	3.10297	1	0.761618	1.31299
SmLAC52-Fl	32.303	20.7631	11.5399	2.44911	0.183123	-0.737257		-1.0103			-1.23097	-1.01379	-0.998274	0.00873711	-1.03587	-0.960682		0.100398	0.0920731	0.109476	0.0424825	0.0389599	0.0463237
SmLAC52-Rt	29.8252	20.5593	9.26589	0.175063	0.885729	-0.0526992	0.203565	-0.256264		0.81909	-0.312864	-0.257666
SmLAC52-St	25.7628	20.4286	5.33423	-3.7566	13.516	1.13085		0.927284			1.13209	0.932357
SmLAC52-Le	27.7607	20.4125	7.34819	-1.74264	3.34646	0.524586		0.321021			0.391924	0.322777
SmLAC52-Fl	32.4168	20.7067	11.7101	2.61926	0.162751	-0.788476		-0.992041			-1.21115	-0.997468
SmLAC52-Rt	29.8716	20.5316	9.34007	0.249242	0.841338	-0.0750294	0.234801	-0.30983		0.830892	-0.372889	-0.307101
SmLAC52-St	25.7407	20.48	5.26068	-3.83015	14.223	1.15299		0.918189			1.10506	0.910099
SmLAC52-Le	27.5343	20.4989	7.0354	-2.05543	4.15667	0.618746		0.383945			0.462088	0.380562
SmLAC52-Fl	32.303	20.6958	11.6072	2.51637	0.174782	-0.757503		-0.992304			-1.19426	-0.98356
SmLAC53-Rt	30.6836	20.8795	9.80412	0	1	0	1.18763	-1.18763		0.99573	-1.19272	-1.10982	-1.16927	0.0303558	-1.29988	-1.03866		0.0677219	0.0501324	0.0914828	0.0082358	0.00609671	0.0111254
SmLAC53-St	24.1096	20.3253	3.7843	-6.01982	64.8855	1.81215		0.62452			0.627199	0.583603	0.545101	0.0320017	0.407409	0.682793		3.50834	2.55511	4.81719	0.426656	0.310732	0.585828
SmLAC53-Le	23.3771	20.8205	2.55662	-7.2475	151.954	2.18171		0.994086			0.998349	0.928955	0.915023	0.0232644	0.814924	1.01512		8.22287	6.53017	10.3543	1	0.794148	1.25921
SmLAC53-Fl	27.7103	20.4197	7.29059	-2.51353	5.71015	0.756648		-0.43098			-0.432828	-0.402742	-0.290854	0.0560133	-0.531859	-0.0498477		0.511854	0.29386	0.891564	0.0622477	0.0357369	0.108425
SmLAC53-Rt	30.5394	20.8612	9.67823	-0.125885	1.09118	0.0378951	1.15209	-1.11419		0.87242	-1.27713	-1.18836
SmLAC53-St	24.773	20.296	4.47705	-5.32707	40.1427	1.60361		0.451518			0.517547	0.481573
SmLAC53-Le	23.8428	20.8138	3.02897	-6.77514	109.527	2.03952		0.887433			1.01721	0.946503
SmLAC53-Fl	27.1899	20.4663	6.72359	-3.08053	8.45926	0.927333		-0.224757			-0.257624	-0.239717
SmLAC53-Rt	30.6836	20.8744	9.80913	0.00501411	0.996531	-0.0015094	1.19881	-1.20032		0.923324	-1.3	-1.20964
SmLAC53-St	24.2946	20.3522	3.94241	-5.86171	58.15	1.76455		0.565737			0.612718	0.570129
SmLAC53-Le	23.7728	20.8176	2.95522	-6.8489	115.272	2.06172		0.862912			0.934572	0.869611
SmLAC53-Fl	27.0032	20.4229	6.58024	-3.22388	9.34294	0.970483		-0.228329			-0.24729	-0.230101
SmLAC54-Rt	27.6251	20.8795	6.74569	0	1	0	-0.299786	0.299786		1.2168	0.246373	0.304365	0.310676	0.0183105	0.231893	0.38946		2.04492	1.70566	2.45166	30.0383	25.0549	36.013
SmLAC54-St	30.4734	20.3253	10.1481	3.4024	0.0945749	-1.02422		-0.724438			-0.595364	-0.735504	-0.744951	0.0116355	-0.795015	-0.694887		0.179907	0.160319	0.201889	2.64271	2.35497	2.9656
SmLAC54-Le	32.3975	20.8205	11.577	4.83135	0.0351252	-1.45438		-1.15459			-0.948879	-1.17223	-1.167	0.00269439	-1.17859	-1.15541		0.068077	0.0662838	0.0699187	1	0.973659	1.02705
SmLAC54-Fl	22.9151	20.4197	2.49541	-4.25028	19.031	1.27946		1.57925			1.29787	1.60337	1.60127	0.00811681	1.56635	1.6362		39.9277	36.8426	43.2711	586.508	541.191	635.621
SmLAC54-Rt	27.3965	20.8612	6.53533	-0.210367	1.15698	0.0633267	-0.225829	0.289156		1.26408	0.228748	0.282592
SmLAC54-St	30.2775	20.296	9.98149	3.2358	0.106152	-0.974073		-0.748243			-0.591926	-0.731256
SmLAC54-Le	32.2713	20.8138	11.4575	4.71185	0.0381586	-1.41841		-1.19258			-0.943433	-1.1655
SmLAC54-Fl	22.4755	20.4663	2.00917	-4.73652	26.6585	1.42584		1.65166			1.30661	1.61417
SmLAC54-Rt	27.4561	20.8744	6.58161	-0.164082	1.12045	0.0493936	-0.292854	0.342248		1.22527	0.279323	0.345072
SmLAC54-St	30.6014	20.3522	10.2492	3.5035	0.088174	-1.05466		-0.761806			-0.621743	-0.768092
SmLAC54-Le	32.3688	20.8176	11.5512	4.80549	0.0357604	-1.4466		-1.15374			-0.941621	-1.16326
SmLAC54-Fl	22.9151	20.4229	2.49214	-4.25356	19.0743	1.28045		1.5733			1.28404	1.58629
SmLAC55-Rt	24.0297	20.5208	3.50887	0	1	0	-1.78979	1.78979		1.33288	1.34279	1.79465	1.78869	0.0030385	1.77562	1.80177		61.4741	59.6511	63.3528	1648.92	1600.02	1699.31
SmLAC55-St	30.9145	20.2957	10.6188	7.10993	0.0072393	-2.1403		-0.350518			-0.262978	-0.351471	-0.342491	0.017025	-0.415744	-0.269238		0.454474	0.383934	0.537975	12.1903	10.2982	14.4301
SmLAC55-Le	35.0505	20.8948	14.1558	10.6469	0.000623678	-3.20504		-1.41525			-1.0618	-1.4191	-1.42851	0.00557298	-1.45249	-1.40453		0.0372815	0.0352788	0.0393978	1	0.946284	1.05677
SmLAC55-Fl	30.0367	20.5026	9.53417	6.02531	0.0153533	-1.8138		-0.0240127			-0.0180156	-0.024078	-0.0176938	0.0143837	-0.079582	0.0441943		0.960077	0.832565	1.10712	25.7521	22.3319	29.6962
SmLAC55-Rt	24.1215	20.4815	3.64007	0.131205	0.913068	-0.0394967	-1.8138	1.7743		1.3272	1.33688	1.78674
SmLAC55-St	30.9283	20.373	10.5553	7.04648	0.00756481	-2.1212		-0.307402			-0.231617	-0.309557
SmLAC55-Le	35.122	20.8429	14.2792	10.7703	0.000572562	-3.24218		-1.42838			-1.07623	-1.43839
SmLAC55-Fl	30.156	20.4938	9.66216	6.15329	0.01405	-1.85232		-0.0385238			-0.0290263	-0.0387938
SmLAC55-Rt	24.0967	20.5024	3.59435	0.08548	0.942471	-0.0257321	-1.82768	1.80195		1.34943	1.33534	1.78468
SmLAC55-St	31.141	20.3316	10.8094	7.30049	0.00634355	-2.19767		-0.36999			-0.274182	-0.366445
SmLAC55-Le	35.2233	20.8533	14.37	10.8611	0.000537626	-3.26952		-1.44184			-1.06848	-1.42803
SmLAC55-Fl	30.0523	20.5049	9.54745	6.03858	0.0152127	-1.81779		0.00988505			0.00732534	0.00979036
SmLAC56-Rt	27.9166	20.5208	7.39579	0	1	0	0.250999	-0.250999		0.365181	-0.687326	-0.251957	-0.237292	0.0107864	-0.283702	-0.190882		0.57904	0.520353	0.644345	0.219263	0.19704	0.243991
SmLAC56-St	28.0579	20.2957	7.76215	0.366358	0.775738	-0.110285		-0.361283			-0.989327	-0.362664	-0.366392	0.011273	-0.414896	-0.317888		0.430138	0.384684	0.480963	0.162879	0.145667	0.182124
SmLAC56-Le	26.1151	20.8948	5.22037	-2.17542	4.51718	0.654867		0.403868			1.10594	0.405411	0.421744	0.0135081	0.363623	0.479864		2.64085	2.31006	3.01901	1	0.874741	1.1432
SmLAC56-Fl	26.3722	20.5026	5.86966	-1.52613	2.88013	0.459412		0.208414			0.570713	0.20921	0.18194	0.0195191	0.0979565	0.265924		1.52034	1.25302	1.84469	0.575701	0.474475	0.698522
SmLAC56-Rt	27.9268	20.4815	7.44535	0.0495597	0.966231	-0.0149189	0.214086	-0.229005		0.388185	-0.589939	-0.216258
SmLAC56-St	28.4208	20.373	8.04778	0.651992	0.636401	-0.196269		-0.410356			-1.05711	-0.387513
SmLAC56-Le	26.0807	20.8429	5.23786	-2.15793	4.46275	0.649602		0.435516			1.12193	0.411273
SmLAC56-Fl	26.5013	20.4938	6.00745	-1.38834	2.61777	0.417931		0.203845			0.525123	0.192498
SmLAC56-Rt	27.9369	20.5024	7.43448	0.0386896	0.973539	-0.0116467	0.218578	-0.230225		0.346363	-0.664692	-0.24366
SmLAC56-St	28.0967	20.3316	7.76512	0.369324	0.774145	-0.111178		-0.329756			-0.952053	-0.349
SmLAC56-Le	26.1151	20.8533	5.26181	-2.13398	4.38926	0.642391		0.423813			1.22361	0.448547
SmLAC56-Fl	26.7222	20.5049	6.21736	-1.17844	2.26331	0.354745		0.136167			0.393133	0.144113
SmLAC57-Rt	24.9451	20.6541	4.29101	0	1	0	-0.479845	0.479845		0.38723	1.23917	0.494763	0.518749	0.012656	0.464295	0.573204		3.30179	2.91269	3.74286	9.04192	7.97638	10.2498
SmLAC57-St	26.0546	20.526	5.52862	1.23761	0.424075	-0.372557		0.107288			0.277065	0.110623	-0.0137107	0.0622067	-0.281364	0.253943		0.968923	0.523161	1.7945	2.65339	1.43267	4.91422
SmLAC57-Le	28.1913	20.8871	7.30415	3.01314	0.123867	-0.907045		-0.4272			-1.10322	-0.440481	-0.437511	0.00582081	-0.462556	-0.412466		0.365165	0.344702	0.386842	1	0.943963	1.05936
SmLAC57-Fl	26.6771	20.2608	6.41631	2.1253	0.229203	-0.639779		-0.159933			-0.413019	-0.164905	-0.067527	0.0492555	-0.279456	0.144402		0.855998	0.525465	1.39445	2.34414	1.43898	3.81868
SmLAC57-Rt	24.7215	20.5997	4.12182	-0.169187	1.12442	0.0509303	-0.513874	0.564805		0.430572	1.31176	0.523742
SmLAC57-St	26.8041	20.548	6.2561	1.96509	0.256123	-0.591551		-0.0776763			-0.180403	-0.0720289
SmLAC57-Le	28.4105	20.8155	7.595	3.30399	0.101251	-0.9946		-0.480726			-1.11648	-0.445775
SmLAC57-Fl	26.2808	20.2615	6.01933	1.72832	0.301802	-0.520277		-0.00640294			-0.0148708	-0.00593742
SmLAC57-Rt	24.7804	20.607	4.17341	-0.117599	1.08493	0.0354007	-0.476395	0.511795		0.380002	1.34682	0.537743
SmLAC57-St	26.7115	20.5859	6.12562	1.83461	0.280366	-0.552274		-0.0758794			-0.199682	-0.0797264
SmLAC57-Le	28.0596	20.8383	7.22129	2.93028	0.131189	-0.882104		-0.405709			-1.06765	-0.426278
SmLAC57-Fl	26.1933	20.2194	5.9739	1.68289	0.311457	-0.506601		-0.0302069			-0.0794914	-0.0317384
SmLAC58-Rt	35.8794	20.6541	15.2253	0	1	0	2.05433	-2.05433		1.42793	-1.43868	-1.96708	-1.96144	0.0028174	-1.97357	-1.94932		0.0109284	0.0106276	0.0112377	0.00180728	0.00175753	0.00185844
SmLAC58-St	25.1929	20.526	4.66695	-10.5584	1507.95	3.17839		1.12405			0.78719	1.07631	1.06599	0.00522651	1.04351	1.08848		11.6411	11.0536	12.2597	1.92514	1.82799	2.02745
SmLAC58-Le	26.6912	20.8871	5.80405	-9.42127	685.622	2.83608		0.781752			0.547471	0.748548	0.781531	0.0165444	0.710346	0.852715		6.04687	5.1327	7.12386	1	0.848819	1.17811
SmLAC58-Fl	28.1684	20.2608	7.90758	-7.31774	159.536	2.20286		0.148527			0.104015	0.142218	0.113921	0.0141594	0.0529974	0.174844		1.29993	1.12979	1.4957	0.214976	0.186839	0.247351
SmLAC58-Rt	35.6718	20.5997	15.0721	-0.153249	1.11207	0.0461324	2.00542	-1.95929		1.36782	-1.43242	-1.95852
SmLAC58-St	25.5909	20.548	5.04289	-10.1824	1162.03	3.06522		1.0598			0.77481	1.05938
SmLAC58-Le	26.7193	20.8155	5.90382	-9.3215	639.812	2.80605		0.800632			0.585335	0.80032
SmLAC58-Fl	28.4965	20.2615	8.23506	-6.99027	127.139	2.10428		0.098859			0.0722751	0.0988205
SmLAC58-Rt	35.2005	20.607	14.5935	-0.631786	1.54948	0.190186	2.06127	-1.87108		1.3061	-1.43257	-1.95873
SmLAC58-St	25.5929	20.5859	5.00701	-10.2183	1191.29	3.07602		1.01475			0.77693	1.06228
SmLAC58-Le	26.6912	20.8383	5.85288	-9.37244	662.805	2.82139		0.760117			0.581974	0.795724
SmLAC58-Fl	28.2777	20.2194	8.05831	-7.16701	143.709	2.15748		0.0962159			0.0736665	0.100723
SmLAC59-Rt	25.932	20.8795	5.05256	0	1	0	-1.08275	1.08275		0.772264	1.40204	1.07014	1.04252	0.0251114	0.934476	1.15057		11.0286	8.59956	14.1439	43.8939	34.2262	56.2925
SmLAC59-St	30.7862	20.3253	10.4609	5.40837	0.0235461	-1.62808		-0.545334			-0.70615	-0.538984	-0.527305	0.0339961	-0.673578	-0.381032		0.296958	0.212042	0.41588	1.18189	0.843926	1.6552
SmLAC59-Le	31.3452	20.8205	10.5247	5.47218	0.0225274	-1.64729		-0.564542			-0.731022	-0.557968	-0.599883	0.0589445	-0.8535	-0.346265		0.251257	0.14012	0.450542	1	0.557676	1.79316
SmLAC59-Fl	28.9789	20.4197	8.55925	3.50669	0.0879797	-1.05562		0.0271294			0.0351297	0.0268135	0.0846657	0.0514729	-0.136804	0.306136		1.21525	0.729786	2.02365	4.83669	2.90455	8.05412
SmLAC59-Rt	25.8633	20.8612	5.00212	-0.0504403	1.03558	0.015184	-0.998564	1.01375		0.779702	1.30017	0.992385
SmLAC59-St	30.2384	20.296	9.94244	4.88987	0.0337288	-1.472		-0.473434			-0.607199	-0.463458
SmLAC59-Le	31.6141	20.8138	10.8003	5.74776	0.0186103	-1.73025		-0.731683			-0.938413	-0.716264
SmLAC59-Fl	28.2003	20.4663	7.73401	2.68145	0.155885	-0.807195		0.191369			0.245438	0.187336
SmLAC59-Rt	26.0829	20.8744	5.20845	0.155886	0.897581	-0.0469262	-1.07649	1.02957		0.737848	1.39536	1.06504
SmLAC59-St	30.8416	20.3522	10.4894	5.43688	0.0230853	-1.63666		-0.560172			-0.759197	-0.579473
SmLAC59-Le	31.1335	20.8176	10.3159	5.26329	0.0260371	-1.58441		-0.507915			-0.688373	-0.525415
SmLAC59-Fl	28.9236	20.4229	8.50063	3.44807	0.0916279	-1.03797		0.0385202			0.0522061	0.0398475
SmLAC60-Rt	24.7539	20.8795	3.87442	0	1	0	-0.640514	0.640514		0.902652	0.709591	0.606332	0.613257	0.00709303	0.582738	0.643776		4.10447	3.82594	4.40328	55.3551	51.5987	59.385
SmLAC60-St	26.8497	20.3253	6.52441	2.64999	0.159321	-0.797728		-0.157214			-0.174169	-0.148824	-0.190472	0.0214875	-0.282925	-0.0980184		0.644953	0.521285	0.797961	8.69819	7.03032	10.7617
SmLAC60-Le	30.8569	20.8205	10.0364	6.16197	0.0139657	-1.85494		-1.21442			-1.3454	-1.14961	-1.1299	0.0101321	-1.1735	-1.08631		0.074148	0.0670664	0.0819774	1	0.904493	1.10559
SmLAC60-Fl	23.9931	20.4197	3.57342	-0.301004	1.232	0.0906114		0.731125			0.809974	0.692107	0.707115	0.00817135	0.671956	0.742273		5.09466	4.69847	5.52425	68.7093	63.3661	74.503
SmLAC60-Rt	24.8539	20.8612	3.99272	0.118302	0.921271	-0.0356124	-0.636926	0.601314		0.818898	0.734296	0.627442
SmLAC60-St	26.9881	20.296	6.69214	2.81772	0.141834	-0.84822		-0.211293			-0.258022	-0.220475
SmLAC60-Le	30.3569	20.8138	9.54308	5.66866	0.0196591	-1.70644		-1.06951			-1.30604	-1.11598
SmLAC60-Fl	24.1993	20.4663	3.73303	-0.141394	1.10297	0.0425639		0.67949			0.829761	0.709015
SmLAC60-Rt	24.7744	20.8744	3.89992	0.0254987	0.982481	-0.00767587	-0.604746	0.59707		0.841892	0.709201	0.605998
SmLAC60-St	26.897	20.3522	6.54487	2.67045	0.157078	-0.803885		-0.199139			-0.236537	-0.202116
SmLAC60-Le	30.3801	20.8176	9.56252	5.6881	0.019396	-1.71229		-1.10754			-1.31554	-1.1241
SmLAC60-Fl	23.949	20.4229	3.52607	-0.348353	1.27311	0.104865		0.709611			0.842876	0.720222
SmLAC61-Rt	23.549	20.9489	2.60013	0	1	0	-1.05301	1.05301		1.16612	0.903003	1.0013	1.05023	0.0254734	0.940624	1.15983		11.2261	8.72217	14.4488	24.4182	18.9718	31.4279
SmLAC61-St	31.6635	20.5156	11.148	8.54784	0.00267204	-2.57316		-1.52015			-1.30359	-1.4455	-1.40836	0.0196042	-1.49271	-1.32401		0.0390514	0.0321578	0.0474228	0.0849419	0.0699474	0.103151
SmLAC61-Le	27.7016	20.6362	7.06543	4.46531	0.0452699	-1.34419		-0.291181			-0.2497	-0.276882	-0.337485	0.0318339	-0.474455	-0.200515		0.459743	0.335386	0.63021	1	0.729508	1.37079
SmLAC61-Fl	24.1602	20.5812	3.57907	0.978948	0.50735	-0.294693		0.758317			0.650291	0.72108	0.695621	0.0132383	0.638661	0.75258		4.96159	4.35172	5.65693	10.7921	9.46556	12.3045
SmLAC61-Rt	23.4904	20.8548	2.63558	0.0354577	0.975722	-0.0106738	-1.06725	1.05657		1.10279	0.958092	1.06239
SmLAC61-St	31.2664	20.4934	10.773	8.17284	0.0034652	-2.46027		-1.39302			-1.26318	-1.40069
SmLAC61-Le	28.0016	20.6969	7.30468	4.70456	0.0383519	-1.41621		-0.348966			-0.316439	-0.350886
SmLAC61-Fl	24.416	20.5475	3.86855	1.26842	0.415114	-0.381833		0.685415			0.621529	0.689187
SmLAC61-Rt	23.6593	20.8829	2.77641	0.176286	0.884978	-0.0530673	-1.08988	1.03681		1.05766	0.980283	1.08699
SmLAC61-St	31.1299	20.5402	10.5897	7.98962	0.00393446	-2.40511		-1.31524			-1.24353	-1.3789
SmLAC61-Le	28.0847	20.6451	7.43952	4.83939	0.0349299	-1.4568		-0.366927			-0.346923	-0.384688
SmLAC61-Fl	24.6601	20.5833	4.07678	1.47665	0.359321	-0.444517		0.645358			0.610174	0.676596
SmLAC62-Rt	35.7624	20.9489	14.8135	0	1	0	1.49556	-1.49556		1.15444	-1.82223	-1.50073	-1.4665	0.0371338	-1.62628	-1.30673		0.0341583	0.0236441	0.0493481	0.00497517	0.00344377	0.0208812
SmLAC62-St	27.2636	20.5156	6.74806	-8.06547	267.885	2.42795		0.93239			1.13605	0.935617	0.966755	0.0207322	0.877552	1.05596		9.26308	7.54313	11.3752	1.34917	1.09866	4.81331
SmLAC62-Le	27.5343	20.6362	6.89815	-7.91538	241.416	2.38277		0.887207			1.081	0.890277	0.836689	0.0283886	0.714543	0.958835		6.86576	5.18254	9.09568	1	0.754838	3.84875
SmLAC62-Fl	31.503	20.5812	10.9218	-3.89171	14.843	1.17152		-0.324039			-0.394817	-0.32516	-0.336941	0.0115061	-0.386448	-0.287434		0.460319	0.410726	0.5159	0.0670456	0.0598223	0.218299
SmLAC62-Rt	35.6252	20.8548	14.7704	-0.0431394	1.03035	0.0129862	1.51126	-1.49827		1.15844	-1.82919	-1.50647
SmLAC62-St	26.9628	20.4934	6.46945	-8.34408	324.952	2.51182		1.00056			1.22155	1.00604
SmLAC62-Le	27.7607	20.6969	7.06379	-7.74974	215.23	2.3329		0.821647			1.00312	0.826142
SmLAC62-Fl	31.4168	20.5475	10.8694	-3.94418	15.3928	1.18732		-0.32394			-0.395487	-0.325712
SmLAC62-Rt	35.1624	20.8829	14.2796	-0.533974	1.44791	0.160742	1.56543	-1.40469		1.10777	-1.69058	-1.39231
SmLAC62-St	26.9407	20.5402	6.40054	-8.41299	340.849	2.53256		0.967134			1.16397	0.958613
SmLAC62-Le	27.5986	20.6451	6.95341	-7.86012	232.344	2.36613		0.800703			0.963666	0.793648
SmLAC62-Fl	31.403	20.5833	10.8197	-3.99388	15.9323	1.20228		-0.363151			-0.437061	-0.359951
SmLAC63-Rt	25.3836	20.6541	4.72948	0	1	0	-0.56023	0.56023		0.383589	0.562633	0.523525	0.610258	0.0546713	0.375027	0.84549		4.07623	2.37152	7.00632	8.76884	5.10165	0.852054
SmLAC63-St	27.8584	20.526	7.33238	2.6029	0.164607	-0.783552		-0.223321			-0.224279	-0.208689	-0.191472	0.00860899	-0.228513	-0.15443		0.64347	0.590863	0.700761	1.38424	1.27107	0.085221
SmLAC63-Le	28.3771	20.8871	7.49	2.76052	0.147571	-0.831		-0.27077			-0.271931	-0.253029	-0.332684	0.0559429	-0.573387	-0.0919811		0.464854	0.267063	0.809131	1	0.57451	0.0984001
SmLAC63-Fl	27.071	20.2608	6.81024	2.08076	0.23639	-0.62637		-0.0661398			-0.0664235	-0.0618065	-0.0861028	0.0135753	-0.144513	-0.0276929		0.820157	0.716948	0.938225	1.76434	1.54231	0.1141
SmLAC63-Rt	25.0394	20.5997	4.43971	-0.289767	1.22244	0.0872284	-0.579667	0.666896		0.466037	0.764421	0.711287
SmLAC63-St	27.773	20.548	7.22498	2.4955	0.177328	-0.751222		-0.171554			-0.196642	-0.182974
SmLAC63-Le	28.8428	20.8155	8.02725	3.29777	0.101688	-0.992729		-0.413062			-0.473467	-0.440556
SmLAC63-Fl	27.1899	20.2615	6.92842	2.19894	0.217798	-0.661947		-0.0822796			-0.094312	-0.0877565
SmLAC63-Rt	25.0836	20.607	4.47662	-0.252856	1.19156	0.0761172	-0.515256	0.591373		0.402297	0.640483	0.595964
SmLAC63-St	27.6295	20.5859	7.04354	2.31406	0.201094	-0.696601		-0.181345			-0.196404	-0.182753
SmLAC63-Le	28.283	20.8383	7.44475	2.71527	0.152273	-0.817377		-0.302121			-0.32721	-0.304466
SmLAC63-Fl	27.019	20.2194	6.79958	2.07011	0.238142	-0.623164		-0.107908			-0.116869	-0.108745
SmLAC64-Rt	26.1925	20.6541	5.53842	0	1	0	-0.581936	0.581936		0.397003	0.478252	0.590825	0.365894	0.215667	-0.562045	1.29383		2.32217	0.274129	19.6713	7.4074	0.874433	288.957
SmLAC64-St	28.4734	20.526	7.9474	2.40898	0.188289	-0.725175		-0.143239			-0.117718	-0.145427	-0.379387	0.198284	-1.23254	0.473761		0.417458	0.0585415	2.97688	1.33163	0.186739	43.7281
SmLAC64-Le	29.3975	20.8871	8.51042	2.972	0.12745	-0.894661		-0.312725			-0.257007	-0.317502	-0.503772	0.202396	-1.37461	0.367066		0.313493	0.0422075	2.32845	1	0.134636	34.2031
SmLAC64-Fl	28.1508	20.2608	7.89004	2.35162	0.195926	-0.707908		-0.125972			-0.103527	-0.127896	-0.278497	0.181675	-1.06018	0.503188		0.526626	0.0870597	3.18558	1.67987	0.277708	46.7938
SmLAC64-Rt	26.1396	20.5997	5.53997	0.00155308	0.998924	-0.000467522	-0.58592	0.585453		0.401332	0.463144	0.572162
SmLAC64-St	28.7775	20.548	8.22942	2.69101	0.154855	-0.810074		-0.224153			-0.177325	-0.219064
SmLAC64-Le	29.2713	20.8155	8.45582	2.9174	0.132366	-0.878225		-0.292304			-0.231238	-0.285668
SmLAC64-Fl	27.9755	20.2615	7.714	2.17558	0.221352	-0.654916		-0.0689956			-0.0545815	-0.0674292
SmLAC64-Rt	26.3605	20.607	5.75358	0.215163	0.861449	-0.0647705	-0.591937	-0.0647705		0.367814	-0.0528621	-0.065305
SmLAC64-St	28.6734	20.5859	8.08746	2.54904	0.170868	-0.767338		-0.767338			-0.626259	-0.773671
SmLAC64-Le	29.3688	20.8383	8.53052	2.9921	0.125686	-0.900713		-0.900713			-0.735112	-0.908146
SmLAC64-Fl	27.867	20.2194	7.6476	2.10918	0.231778	-0.634927		-0.634927			-0.518192	-0.640167
SmLAC65-Rt	29.5967	20.6651	8.93165	0	1	0	0.447327	-0.447327		0.366033	-0.335609	-0.448543	-0.44309	0.00446269	-0.462292	-0.423889		0.360504	0.344912	0.3768	0.418757	0.400646	10.1069
SmLAC65-St	27.6145	20.4057	7.20882	-1.72284	3.30085	0.518625		0.0712985			0.053492	0.0714923	0.0683631	0.0114267	0.0191979	0.117528		1.17048	1.0452	1.31078	1.35961	1.21409	35.1589
SmLAC65-Le	28.0505	20.3955	7.65508	-1.27657	2.42262	0.384286		-0.0630407			-0.0472966	-0.0632121	-0.065052	0.0204754	-0.153151	0.0230467		0.860891	0.702828	1.0545	1	0.816397	28.2848
SmLAC66-Fl	26.3674	20.3803	5.98711	-2.94454	7.69832	0.886396		0.439069			0.329414	0.440263	0.439779	0.0126709	0.38526	0.494298		2.75283	2.42807	3.12103	3.19765	2.82041	83.7153
SmLAC65-Rt	29.4215	20.6399	8.78163	-0.150026	1.10959	0.0451623	0.476384	-0.431222		0.346907	-0.32491	-0.434244
SmLAC65-St	27.6928	20.4994	7.19346	-1.73819	3.33617	0.523249		0.0468648			0.035311	0.0471933
SmLAC65-Le	28.122	20.6721	7.4499	-1.48176	2.79289	0.446053		-0.0303307			-0.0228531	-0.0305433
SmLAC65-Fl	26.4156	20.444	5.97158	-2.96008	7.78165	0.891072		0.414688			0.312452	0.417594
SmLAC65-Rt	29.5967	20.6848	8.91191	-0.0197382	1.01378	0.0059418	0.456743	-0.450802		0.382282	-0.334067	-0.446483
SmLAC65-St	27.6145	20.4899	7.12458	-1.80707	3.49931	0.543983		0.0872396			0.0646491	0.0864038
SmLAC65-Le	28.2329	20.4784	7.75449	-1.17716	2.26132	0.354362		-0.102381			-0.07587	-0.101401
SmLAC65-Fl	26.3674	20.5008	5.86655	-3.0651	8.36925	0.922687		0.465943			0.345288	0.46148
